# Supplementary material
Source: HighWire-hosted journal article supplement (https://oem.bmj.com/content/75/8/545)
Supplement: inline-supplementary-material-1 [file inline-supplementary-material-1.docx]

**Supplementary Tables – Hazard ratios for lung cancer among all industries and occupations at the division, major, and minor levels (only those with >5 cases in either sex)**

**Table 1. Hazard ratios for lung cancer among all industries, division level**

|  |  | **Male** |  | **Female** |  |
| --- | --- | --- | --- | --- | --- |
| **Industry** |  | **Cases**  **(# of workers)** | **Hazard Ratio**  **(99% CI)** | **Cases**  **(# of workers)** | **Hazard Ratio**  **(99% CI)** |
| Agriculture |  | 294 (26,432) | 0.78 (0.67, 0.91) | 85 (8,688) | 0.91 (0.69, 1.20) |
| Forestry, fishing and trapping |  | 241 (10,239) | 1.13 (0.95, 1.33) | 8 (482) | 1.97 (0.79, 4.90) |
| Mines (including milling), quarries and oil wells |  | 787 (22,727) | 1.42 (1.29, 1.56) | 11 (477) | 1.88 (0.87, 4.10) |
| Manufacturing |  | 10,012 (529,572) | 0.95 (0.92, 0.99) | 2,680 (165,151) | 1.04 (0.98, 1.11) |
| Construction |  | 3,550 (202,386) | 1.08 (1.03, 1.13) | 98 (9,163) | 1.15 (0.89, 1.50) |
| Transportation, communication and other utilities |  | 3,160 (164,500) | 1.14 (1.08, 1.20) | 373 (33,029) | 1.10 (0.96, 1.26) |
| Wholesale and retail trade |  | 3,622 (291,424) | 0.93 (0.89, 0.97) | 1,774 (138,446) | 1.16 (1.08, 1.24) |
| Finance, insurance, and real estate |  | 347 (15,258) | 1.21 (1.05, 1.39) | 132 (8,762) | 1.03 (0.82, 1.29) |
| Community, business, and personal service |  | 3,262 (249,609) | 0.99 (0.94, 1.04) | 4,004 (350,647) | 0.92 (0.87, 0.97) |
| Public administration and defense |  | 2,464 (121,723) | 1.04 (0.99, 1.10) | 847 (69,369) | 1.05 (0.96, 1.15) |

**Table 2. Hazard ratios for lung cancer among all occupations, division level**

|  | **Male** |  | **Female** |  |
| --- | --- | --- | --- | --- |
| **Occupation** | **Cases**  **(# of workers)** | **Hazard Ratio**  **(99% CI)** | **Cases**  **(# of workers)** | **Hazard Ratio**  **(99% CI)** |
| Managerial, administrative and related | 181 (14,293) | 0.89 (0.74, 1.08) | 166 (16,735) | 1.23 (1.00, 1.50) |
| Natural sciences, engineering and mathematics | 238 (20,853) | 0.81 (0.69, 0.96) | 49 (5,513) | 1.10 (0.76, 1.59) |
| Social sciences and related fields | 70 (6,848) | 1.06 (0.78, 1.44) | 180 (23,873) | 1.00 (0.83, 1.22) |
| Teaching and related | 79 (10,063) | 0.54 (0.40, 0.72) | 256 (38,443) | 0.64 (0.54, 0.75) |
| Medicine/health | 176 (17,102) | 0.81 (0.66, 0.98) | 1,286 (118,332) | 0.86 (0.79, 0.93) |
| Artistic, literary, recreational and related | 96 (8,414) | 1.14 (0.88, 1.48) | 35 (6,589) | 0.99 (0.64, 1.53) |
| Clerical and related | 1,399 (96,479) | 1.01 (0.94, 1.09) | 1,425 (101,036) | 1.19 (1.10, 1.28) |
| Sales | 664 (71,865) | 0.93 (0.84, 1.03) | 851 (76,372) | 1.21 (1.10, 1.32) |
| Service | 2,862 (187,431) | 1.03 (0.98, 1.08) | 2,527 (183,816) | 1.11 (1.04, 1.18) |
| Farming, horticultural and animal husbandry | 478 (39,286) | 0.90 (0.80, 1.01) | 77 (10,979) | 0.76 (0.57, 1.02) |
| Fishing, hunting, trapping and related occupations | 11 (518) | 1.23 (0.56, 2.67) | 0 (40) | - |
| Forestry/logging | 209 (10,115) | 1.03 (0.86, 1.23) | 7 (592) | 1.50 (0.57, 3.98) |
| Mining /quarrying including oil/gas field | 435 (12,885) | 1.45 (1.28, 1.64) | 6 (149) | 4.53 (1.58, 12.97) |
| Processing – metal/clay, glass, stone/chemicals | 1,160 (62,933) | 1.15 (1.06, 1.24) | 267 (16,436) | 1.32 (1.12, 1.55) |
| Processing – food/wood/pulp/textile | 1,003 (67,405) | 0.97 (0.90, 1.06) | 425 (31,953) | 1.05 (0.93, 1.20) |
| Machining and related | 3,227 (168,362) | 1.09 (1.03, 1.14) | 388 (21,389) | 1.32 (1.15, 1.51) |
| Product fabricating, assembling and repairing | 4,682 (261,579) | 1.00 (0.96, 1.04) | 1,134 (67,141) | 1.07 (0.99, 1.16) |
| Construction trades | 4,012 (211,691) | 1.09 (1.04, 1.13) | 64 (4,388) | 1.60 (1.16, 2.22) |
| Transport equipment operating | 3,468 (154,219) | 1.38 (1.32, 1.45) | 204 (14,210) | 1.52 (1.26, 1.82) |
| Materials handling and related, NEC. | 1,975 (122,096) | 1.10 (1.04, 1.17) | 547 (31,180) | 1.13 (1.01, 1.27) |
| Other crafts and equipment operating | 421 (21,580) | 1.04 (0.92, 1.18) | 151 (6,770) | 1.40 (1.13, 1.73) |
| Occupation NEC | 2,814 (174,830) | 1.07 (1.02, 1.13) | 596 (40,744) | 1.28 (1.15, 1.43) |

**Table 3. Hazard ratios for lung cancer among all industries, major level**

|  | **Male** |  | **Female** |  |
| --- | --- | --- | --- | --- |
| **Industry** | **Cases**  **(# of workers)** | **Hazard Ratio**  **(99% CI)** | **Cases**  **(# of workers)** | **Hazard Ratio**  **(99% CI)** |
| Agriculture | 294 (26,432) | 0.78 (0.67, 0.91) | 85 (8,688) | 0.91 (0.69, 1.20) |
| Forestry | 234 (9,851) | 1.13 (0.95, 1.34) | 8 (449) | 2.47 (0.99, 6.14) |
| Fishing/trapping | 7 (391) | 1.04 (0.39, 2.74) | 0 (33) | - |
| Metal mines | 572 (13,612) | 1.45 (1.30, 1.62) | 6 (247) | 1.79 (0.62, 5.11) |
| Non-metal mines | 33 (1,026) | 1.42 (0.91, 2.23) | ≤5 cases (63) | - |
| Quarries/sand pits | 107 (3,923) | 1.57 (1.22, 2.01) | ≤5 cases (102) | - |
| Services incidental to mining | 87 (4,577) | 1.14 (0.87, 1.51) | 0 (66) | - |
| Food/beverage | 1,043 (61,356) | 0.92 (0.85, 1.00) | 361 (27,442) | 0.86 (0.75, 0.99) |
| Tobacco products | 20 (682) | 1.10 (0.62, 1.96) | 15 (435) | 1.60 (0.82, 3.11) |
| Rubber/plastics products | 470 (35,583) | 0.87 (0.78, 0.99) | 257 (18,116) | 1.04 (0.89, 1.23) |
| Leather | 32 (2,205) | 0.68 (0.43, 1.07) | 47 (3,480) | 0.73 (0.50, 1.06) |
| Textile | 205 (10,438) | 1.07 (0.89, 1.28) | 164 (8,878) | 1.05 (0.85, 1.28) |
| Knitting mills | 21 (961) | 1.18 (0.68, 2.08) | 46 (2,332) | 0.94 (0.64, 1.38) |
| Clothing | 38 (2,757) | 0.67 (0.44, 1.02) | 82 (7,379) | 0.51 (0.38, 0.68) |
| Wood | 483 (34,009) | 1.02 (0.91, 1.15) | 59 (4,164) | 1.16 (0.83, 1.62) |
| Furniture/fixture | 306 (24,724) | 0.72 (0.62, 0.83) | 51 (5,533) | 0.55 (0.38, 0.79) |
| Paper | 407 (20,106) | 0.99 (0.87, 1.13) | 105 (5,178) | 1.22 (0.95, 1.58) |
| Printing/publishing | 277 (17,317) | 1.00 (0.86, 1.17) | 173 (8,679) | 1.42 (1.17, 1.73) |
| Primary metal | 1,072 (39,634) | 1.10 (1.02, 1.20) | 45 (2,493) | 1.21 (0.82, 1.77) |
| Metal fabricating | 1,742 (108,911) | 0.99 (0.93, 1.06) | 296 (18,830) | 1.13 (0.97, 1.32) |
| Machinery (except electrical machinery) | 784 (37,133) | 1.02 (0.93, 1.12) | 72 (4,718) | 1.19 (0.88, 1.62) |
| Transportation equipment | 2,230 (103,864) | 1.00 (0.95, 1.06) | 426 (23,950) | 1.37 (1.20, 1.55) |
| Electrical products | 493 (23,152) | 1.02 (0.91, 1.14) | 331 (15,401) | 1.19 (1.03, 1.38) |
| Non-metallic mineral products | 535 (22,219) | 1.24 (1.11, 1.38) | 50 (2,696) | 1.05 (0.73, 1.51) |
| Petroleum/coal products | 17 (1,073) | 0.78 (0.42, 1.45) | 0 (85) | - |
| Chemical/chemical products | 261 (15,401) | 0.94 (0.80, 1.11) | 96 (6,152) | 1.01 (0.78, 1.32) |
| Miscellaneous manufacturing | 227 (13,947) | 1.00 (0.84, 1.18) | 123 (7,563) | 1.01 (0.80, 1.28) |
| General contractors | 1,406 (70,476) | 1.17 (1.09, 1.26) | 42 (4,338) | 0.98 (0.66, 1.46) |
| Special-trade contractors | 2,309 (140,511) | 1.04 (0.99, 1.10) | 58 (4,859) | 1.37 (0.97, 1.92) |
| Transportation | 2,337 (117,420) | 1.22 (1.15, 1.29) | 186 (18,618) | 1.14 (0.94, 1.38) |
| Storage | 127 (9,174) | 1.23 (0.98, 1.55) | 9 (1,454) | 1.19 (0.51, 2.82) |
| Communication | 342 (20,130) | 0.86 (0.75, 0.99) | 152 (10,853) | 1.06 (0.86, 1.30) |
| Electric power, gas and water utilities | 387 (20,167) | 1.03 (0.90, 1.17) | 28 (2,248) | 1.15 (0.71, 1.88) |
| Wholesale trade | 1,682 (124,150) | 1.02 (0.95, 1.09) | 354 (27,090) | 1.21 (1.05, 1.39) |
| Retail trade | 2,008 (175,767) | 0.88 (0.83, 0.93) | 1,439 (112,744) | 1.14 (1.06, 1.23) |
| Finance | 63 (3,286) | 0.93 (0.67, 1.28) | 22 (1,648) | 0.69 (0.40, 1.20) |
| Insurance/real estate | 284 (12,004) | 1.29 (1.11, 1.51) | 111 (7,118) | 1.15 (0.90, 1.48) |
| Education and related services | 766 (39,616) | 0.98 (0.89, 1.08) | 603 (59,323) | 0.83 (0.74, 0.92) |
| Health/welfare services | 501 (29,162) | 0.98 (0.88, 1.10) | 1,880 (149,425) | 0.93 (0.87, 1.00) |
| Religious organizations | 18 (674) | 1.16 (0.63, 2.13) | 8 (790) | 0.70 (0.28, 1.74) |
| Amusement/recreation services | 126 (11,813) | 1.01 (0.80, 1.27) | 71 (8,352) | 1.26 (0.93, 1.72) |
| Services to business management | 758 (66,724) | 1.20 (1.10, 1.32) | 286 (27,165) | 1.25 (1.07, 1.46) |
| Personal services | 104 (6,154) | 1.09 (0.84, 1.40) | 92 (6,808) | 1.00 (0.76, 1.31) |
| Accommodation/food services | 523 (67,314) | 0.71 (0.64, 0.80) | 901 (86,117) | 1.03 (0.94, 1.12) |
| Miscellaneous services | 545 (36,459) | 1.23 (1.10, 1.38) | 295 (23,357) | 1.06 (0.91, 1.24) |
| Federal administration | 462 (18,203) | 1.03 (0.91, 1.16) | 227 (14,558) | 1.14 (0.96, 1.36) |
| Provincial administration | 475 (25,421) | 1.00 (0.89, 1.13) | 268 (18,366) | 1.10 (0.94, 1.29) |
| Local administration | 1,361 (74,081) | 1.05 (0.98, 1.13) | 339 (35,678) | 1.00 (0.87, 1.15) |
| Other government offices | 314 (9,854) | 1.16 (1.00, 1.34) | 48 (2,329) | 0.93 (0.64, 1.35) |

**Table 4. Hazard ratios for lung cancer among all occupations, major level**

|  | **Male** |  | **Female** |  |
| --- | --- | --- | --- | --- |
| **Occupation** | **Cases**  **(# of workers)** | **Hazard Ratio**  **(99% CI)** | **Cases**  **(# of workers)** | **Hazard Ratio**  **(99% CI)** |
| Officials/administrators unique to government | 47 (2,844) | 0.75 (0.52, 1.10) | 34 (3,059) | 1.32 (0.85, 2.06) |
| Other managers/administrators | 93 (7,190) | 0.96 (0.74, 1.26) | 66 (6,016) | 1.08 (0.79, 1.49) |
| Management/administration | 47 (4,440) | 1.05 (0.72, 1.53) | 67 (7,876) | 1.35 (0.98, 1.85) |
| Physical sciences | 24 (2,496) | 0.53 (0.31, 0.90) | ≤5 cases (713) | - |
| Life sciences | 22 (1,799) | 0.92 (0.53, 1.59) | ≤5 cases (764) | - |
| Architects/engineers | 54 (3,686) | 0.83 (0.58, 1.18) | 8 (695) | 1.22 (0.49, 3.03) |
| Other architecture/engineering | 134 (11,937) | 0.87 (0.70, 1.09) | 21 (2,247) | 1.44 (0.82, 2.53) |
| Other mathematics statistics systems analysis | 9 (1,361) | 1.04 (0.44, 2.45) | 13 (1,160) | 1.64 (0.80, 3.35) |
| Other social sciences | 13 (1,948) | 0.79 (0.38, 1.60) | 40 (6,204) | 0.91 (0.61, 1.37) |
| Social work and related | 59 (5,187) | 1.13 (0.81, 1.58) | 154 (18,729) | 1.07 (0.87, 1.32) |
| University teaching and related | 6 (442) | 0.88 (0.31, 2.53) | 12 (1,753) | 1.15 (0.55, 2.42) |
| Elementary/secondary school teaching and related | 56 (8,261) | 0.48 (0.34, 0.67) | 228 (34,704) | 0.63 (0.53, 0.75) |
| Other teaching and related | 19 (1,525) | 0.78 (0.43, 1.41) | 26 (3,056) | 0.68 (0.41, 1.13) |
| Nursing therapy and related assisting | 154 (14,816) | 0.82 (0.67, 1.01) | 1,215 (109,323) | 0.86 (0.79, 0.93) |
| Other medicine/health | 19 (2,323) | 0.72 (0.40, 1.30) | 79 (10,361) | 1.01 (0.76, 1.35) |
| Fine/commercial art photography and related | 24 (1,535) | 1.27 (0.75, 2.16) | 10 (1,147) | 0.96 (0.42, 2.16) |
| Performing/audiovisual arts | 12 (1,629) | 0.99 (0.47, 2.08) | ≤5 cases (660) | - |
| Sport/recreation | 58 (5,017) | 1.16 (0.83, 1.63) | 22 (4,374) | 1.27 (0.73, 2.20) |
| Stenographic/typing | 7 (297) | 1.43 (0.54, 3.78) | 183 (10,362) | 0.99 (0.82, 1.20) |
| Bookkeepers, tellers/cashiers and other clerks | 42 (4,483) | 0.94 (0.63, 1.40) | 438 (30,869) | 1.34 (1.18, 1.52) |
| Office machine/electronic data processing equipment operators | 16 (984) | 1.13 (0.59, 2.14) | 43 (3,389) | 0.91 (0.62, 1.36) |
| Material recording scheduling/distributing | 899 (58,682) | 1.08 (0.99, 1.18) | 234 (14,119) | 1.34 (1.13, 1.59) |
| Library file/correspondence clerks and related | ≤5 cases (255) | - | 18 (1,634) | 0.61 (0.33, 1.12) |
| Mail/postal clerks | 102 (7,283) | 0.89 (0.69, 1.15) | 122 (6,921) | 1.16 (0.91, 1.46) |
| Mail carriers | 235 (11,676) | 1.03 (0.87, 1.22) | 55 (5,090) | 1.16 (0.82, 1.64) |
| Other reception information mail/message distribution | 69 (8,258) | 0.92 (0.67, 1.25) | 117 (8,696) | 1.30 (1.02, 1.65) |
| Other clerical and related | 95 (8,953) | 0.93 (0.71, 1.21) | 293 (24,668) | 1.18 (1.01, 1.37) |
| Sales commodities | 590 (66,869) | 0.94 (0.84, 1.04) | 826 (73,233) | 1.20 (1.09, 1.32) |
| Sales services | 15 (629) | 1.01 (0.52, 1.96) | ≤5 cases (455) | - |
| Other sales | 71 (4,989) | 0.93 (0.69, 1.27) | 26 (3,295) | 2.06 (1.24, 3.42) |
| Fire-fighting | 173 (11,674) | 0.93 (0.76, 1.13) | ≤5 cases (402) | - |
| Other protective service | 361 (18,012) | 1.27 (1.11, 1.46) | 73 (6,981) | 1.18 (0.87, 1.60) |
| Police/detectives | 169 (19,479) | 0.67 (0.55, 0.82) | 16 (3,881) | 0.75 (0.39, 1.43) |
| Food/beverage preparation and related service | 229 (30,956) | 0.72 (0.60, 0.85) | 416 (25,717) | 1.26 (1.11, 1.44) |
| Waiters, hostesses, stewards and bartenders | 77 (7,678) | 0.87 (0.65, 1.17) | 313 (28,539) | 1.08 (0.93, 1.25) |
| Lodging/other accommodation | 52 (2,674) | 1.09 (0.76, 1.56) | 122 (5,954) | 0.84 (0.66, 1.06) |
| Barbers, hairdressers and related | ≤5 cases (101) | - | 11 (1,203) | 0.90 (0.42, 1.97) |
| Other personal service | 49 (4,422) | 1.03 (0.71, 1.49) | 466 (36,338) | 1.22 (1.08, 1.38) |
| Laundering, dry cleaning and pressing | 31 (1,874) | 1.10 (0.69, 1.74) | 88 (5,241) | 1.02 (0.77, 1.34) |
| Other apparel/furnishings service | 11 (620) | 0.95 (0.44, 2.08) | 9 (363) | 1.02 (0.43, 2.40) |
| Janitors/charworkers/cleaners | 1,510 (63,163) | 1.26 (1.18, 1.35) | 669 (39,859) | 1.23 (1.11, 1.37) |
| Other service | 316 (23,364) | 0.93 (0.80, 1.07) | 290 (15,052) | 0.98 (0.84, 1.14) |
| Farmers/farm management | 40 (3,535) | 0.68 (0.45, 1.02) | ≤5 cases (854) | - |
| Farm, nursery and related workers | 430 (34,965) | 0.94 (0.83, 1.07) | 68 (8,822) | 0.78 (0.57, 1.07) |
| Other farming horticultural/animal husbandry | 28 (1,836) | 0.95 (0.59, 1.55) | 7 (1,578) | 0.73 (0.28, 1.95) |
| Fishing, hunting, trapping and related | 11 (518) | 1.23 (0.56, 2.67) | ≤5 cases (40) |  |
| Forestry/logging | 209 (10,115) | 1.03 (0.86, 1.23) | 7 (592) | 1.50 (0.57, 3.98) |
| Drilling/blasting | 165 (3,477) | 1.60 (1.31, 1.96) | ≤5 cases (5) |  |
| Other mining/quarrying including oil/gas field | 327 (10,377) | 1.51 (1.31, 1.74) | 6 (145) | 4.78 (1.67, 13.68) |
| Mineral ore treating | 40 (946) | 1.49 (0.99, 2.25) | ≤5 cases (37) | - |
| Metal processing and related | 575 (26,206) | 1.24 (1.11, 1.38) | 30 (2,056) | 1.30 (0.81, 2.08) |
| Clay, glass and stone processing forming and related | 230 (9,018) | 1.24 (1.05, 1.47) | 25 (1,169) | 1.19 (0.71, 1.99) |
| Chemicals, petroleum, rubber and plastic processing | 344 (28,245) | 0.98 (0.85, 1.12) | 212 (13,325) | 1.33 (1.11, 1.59) |
| Food/beverage and related processing | 683 (45,087) | 0.94 (0.85, 1.04) | 305 (24,502) | 1.01 (0.87, 1.17) |
| Wood processing except paper pulp | 98 (5,928) | 1.15 (0.88, 1.49) | 15 (736) | 1.50 (0.77, 2.93) |
| Pulp/papermaking and related | 89 (4,887) | 0.92 (0.70, 1.21) | 11 (823) | 0.88 (0.41, 1.92) |
| Textile processing | 93 (5,372) | 1.08 (0.82, 1.41) | 76 (4,410) | 1.14 (0.85, 1.53) |
| Other processing | 55 (7,142) | 1.44 (1.02, 2.04) | 18 (1,709) | 1.25 (0.68, 2.29) |
| Metal machining | 765 (39,262) | 1.06 (0.97, 1.17) | 43 (2,535) | 1.37 (0.92, 2.03) |
| Metal shaping/forming except machining | 2,261 (118,362) | 1.12 (1.06, 1.19) | 312 (16,764) | 1.35 (1.17, 1.57) |
| Wood machining | 92 (7,562) | 0.88 (0.67, 1.15) | 13 (1,187) | 0.80 (0.39, 1.64) |
| Other machining and related | 298 (12,693) | 1.14 (0.98, 1.32) | 30 (1,548) | 1.27 (0.79, 2.04) |
| Fabricating/assembling (F/A): Metal products | 1,355 (67,503) | 1.11 (1.03, 1.19) | 343 (19,699) | 1.39 (1.21, 1.60) |
| F/A: Electrical/electronic and related equipment | 400 (25,916) | 1.02 (0.89, 1.16) | 273 (12,264) | 1.27 (1.09, 1.49) |
| F/A: Wood products | 259 (21,646) | 0.72 (0.62, 0.85) | 45 (2,942) | 1.00 (0.68, 1.48) |
| F/A: Textile fur/leather products | 146 (8,693) | 0.80 (0.65, 0.99) | 271 (17,990) | 0.71 (0.61, 0.84) |
| F/A: Rubber, plastic and related products | 179 (11,018) | 0.87 (0.71, 1.05) | 80 (4,226) | 1.05 (0.79, 1.40) |
| Mechanics/repairers except electrical | 2,144 (110,296) | 1.04 (0.98, 1.10) | 35 (2,340) | 1.40 (0.90, 2.16) |
| Other product F/A | 514 (35,038) | 1.20 (1.07, 1.34) | 179 (11,831) | 1.48 (1.22, 1.80) |
| Excavating/grading/paving | 527 (17,956) | 1.51 (1.34, 1.69) | 9 (438) | 2.49 (1.06, 5.88) |
| Electrical power, lighting and wire communications equipment | 541 (34,681) | 0.90 (0.80, 1.00) | 13 (1,136) | 1.08 (0.53, 2.20) |
| Other construction trades | 3,015 (162,569) | 1.08 (1.02, 1.13) | 42 (2,845) | 1.71 (1.15, 2.55) |
| Air transport operating | 46 (7,416) | 0.32 (0.22, 0.47) | 8 (1,283) | 0.73 (0.29, 1.82) |
| Railway transport operating | 96 (3,828) | 1.24 (0.95, 1.61) | ≤5 cases (205) | - |
| Water transport operating | 44 (2,553) | 0.99 (0.67, 1.46) | ≤5 cases (141) | - |
| Other motor transport operating | 375 (20,799) | 1.32 (1.15, 1.51) | 92 (4,120) | 1.56 (1.19, 2.05) |
| Truck drivers | 2,931 (117,375) | 1.48 (1.41, 1.56) | 80 (5,150) | 1.48 (1.11, 1.97) |
| Other transport and related equipment operating | 138 (12,210) | 1.76 (1.41, 2.19) | 41 (4,495) | 2.34 (1.56, 3.50) |
| Material handling, not elsewhere classified (NEC) | 1,975 (122,096) | 1.10 (1.04, 1.17) | 547 (31,180) | 1.13 (1.01, 1.27) |
| Printing and related | 207 (13,570) | 0.91 (0.76, 1.09) | 139 (5,907) | 1.40 (1.12, 1.75) |
| Stationary engine/utilities equipment operating | 203 (7,214) | 1.24 (1.03, 1.48) | ≤5 cases (382) | - |
| Other crafts/equipment operating, NEC | 11 (843) | 0.85 (0.39, 1.85) | 9 (505) | 1.63 (0.69, 3.86) |
| Occupations NEC | 2,814 (174,830) | 1.07 (1.02, 1.13) | 596 (40,744) | 1.28 (1.15, 1.43) |

**Table 5. Hazard ratios for lung cancer among all industries, minor level**

|  | **Male** |  | **Female** |  |
| --- | --- | --- | --- | --- |
| **Industry** | **Cases**  **(# of workers)** | **Hazard Ratio**  **(99% CI)** | **Cases**  **(# of workers)** | **Hazard Ratio**  **(99% CI)** |
| Livestock/livestock combination farms | 56 (4,536) | 0.81 (0.57, 1.14) | 11 (1,261) | 0.92 (0.42, 2.00) |
| Field crop/field crop combination farms | 40 (4,189) | 0.55 (0.37, 0.83) | 10 (953) | 0.64 (0.28, 1.44) |
| Fruit/vegetable farms | 24 (3,398) | 0.59 (0.35, 1.00) | 9 (1,006) | 0.73 (0.31, 1.72) |
| Other crop/livestock combination farms | 68 (4,659) | 0.84 (0.61, 1.14) | 17 (1,118) | 1.34 (0.72, 2.50) |
| Miscellaneous specialty farms | 79 (6,773) | 0.97 (0.73, 1.30) | 31 (3,618) | 0.89 (0.56, 1.41) |
| Services incidental to agriculture | 33 (3,383) | 0.94 (0.60, 1.47) | 7 (836) | 1.03 (0.39, 2.73) |
| Logging | 232 (9,382) | 1.15 (0.97, 1.36) | 7 (330) | 2.57 (0.97, 6.82) |
| Fishing | 6 (349) | 0.99 (0.35, 2.84) | 0 (23) | - |
| Placer gold mines | 9 (241) | 2.24 (0.95, 5.26) | 0 (8) | - |
| Gold quartz mines | 97 (2,463) | 1.45 (1.12, 1.89) | 0 (48) | - |
| Uranium mines | 108 (2,224) | 1.93 (1.50, 2.47) | ≤5 cases (42) | - |
| Iron mines | 8 (184) | 1.04 (0.42, 2.59) | 0 0 | - |
| Miscellaneous metal mines | 363 (8,881) | 1.37 (1.20, 1.57) | ≤5 cases (149) | - |
| Miscellaneous non-metal mines | 22 (770) | 1.21 (0.70, 2.09) | ≤5 cases (8) | - |
| Stone quarries | 40 (1,496) | 1.82 (1.21, 2.73) | ≤5 cases (52) | - |
| Sand pits/quarries | 68 (2,488) | 1.44 (1.06, 1.97) | ≤5 cases (53) | - |
| Other contract drilling | 22 (1,506) | 0.88 (0.51, 1.52) | 0 (8) | - |
| Miscellaneous services incidental to mining | 60 (2,920) | 1.22 (0.87, 1.70) | 0 (56) | - |
| Meat/poultry products | 269 (17,430) | 0.87 (0.74, 1.02) | 67 (7,464) | 0.65 (0.48, 0.89) |
| Fish products | 13 (621) | 1.14 (0.56, 2.33) | 9 (553) | 0.77 (0.32, 1.81) |
| Fruit/vegetable processing | 109 (5,567) | 1.06 (0.83, 1.36) | 45 (3,264) | 0.79 (0.54, 1.17) |
| Dairy products | 113 (5,722) | 0.94 (0.74, 1.20) | 26 (1,814) | 1.02 (0.62, 1.70) |
| Flour/breakfast cereal products | 42 (1,716) | 1.32 (0.89, 1.96) | 10 (453) | 1.33 (0.59, 3.01) |
| Feed | 38 (2,721) | 0.61 (0.40, 0.93) | 7 (270) | 1.63 (0.61, 4.31) |
| Bakery products | 146 (8,419) | 0.95 (0.77, 1.18) | 70 (5,886) | 0.79 (0.58, 1.08) |
| Miscellaneous food | 174 (10,252) | 0.97 (0.80, 1.18) | 112 (6,521) | 1.03 (0.80, 1.31) |
| Beverage | 151 (10,046) | 0.88 (0.71, 1.08) | 24 (1,682) | 1.37 (0.81, 2.32) |
| Leaf tobacco processors | 7 (205) | 1.92 (0.72, 5.07) | ≤5 cases (82) | - |
| Tobacco products manufacturers | 13 (477) | 0.90 (0.44, 1.84) | 13 (353) | 1.66 (0.81, 3.40) |
| Rubber products | 172 (9,859) | 0.90 (0.74, 1.09) | 55 (3,182) | 1.27 (0.90, 1.80) |
| Plastics fabricating | 300 (25,897) | 0.86 (0.74, 1.00) | 202 (14,986) | 0.99 (0.83, 1.19) |
| Leather tanneries | 16 (721) | 0.89 (0.47, 1.69) | ≤5 cases (576) | - |
| Shoe factories | 8 (763) | 0.49 (0.20, 1.22) | 26 (1,687) | 0.75 (0.45, 1.24) |
| Luggage, handbag and small leather goods manufacturers | 8 (690) | 0.67 (0.27, 1.66) | 13 (1,126) | 0.61 (0.30, 1.26) |
| Cotton yarn/cloth mills | 14 (636) | 1.00 (0.50, 2.00) | 7 (528) | 0.66 (0.25, 1.74) |
| Wool yarn/cloth mills | 18 (936) | 1.26 (0.68, 2.31) | 14 (1,064) | 1.00 (0.50, 1.98) |
| Man-made fibre, yarn and cloth mills | 63 (1,878) | 1.48 (1.07, 2.05) | 22 (852) | 1.61 (0.93, 2.79) |
| Felt/fibre processing mills | 11 (641) | 0.85 (0.39, 1.86) | ≤5 cases (98) | - |
| Carpet, mat and rug industry | 28 (1,617) | 0.93 (0.57, 1.52) | 16 (1,009) | 0.83 (0.44, 1.58) |
| Canvas products and cotton/jute bags | 7 (742) | 0.60 (0.23, 1.59) | ≤5 cases (555) | - |
| Automobile fabric accessories | 28 (844) | 2.31 (1.42, 3.76) | 42 (1,253) | 2.10 (1.41, 3.13) |
| Miscellaneous textile | 41 (3,045) | 0.79 (0.53, 1.18) | 55 (3,461) | 0.84 (0.60, 1.20) |
| Hosiery mills | ≤5 cases (303) | - | 16 (755) | 1.09 (0.57, 2.08) |
| Knitting mills (except hosiery mills) | 17 (659) | 1.51 (0.81, 2.81) | 32 (1,592) | 0.93 (0.59, 1.46) |
| Men's clothing | 23 (1,438) | 0.86 (0.50, 1.47) | 35 (3,322) | 0.48 (0.31, 0.75) |
| Women's clothing | 8 (383) | 0.77 (0.31, 1.90) | 14 (1,300) | 0.42 (0.21, 0.83) |
| Miscellaneous clothing | 6 (774) | 0.40 (0.14, 1.14) | 26 (2,208) | 0.63 (0.38, 1.05) |
| Sawmills, planing mills and shingle mills | 179 (8,910) | 1.26 (1.04, 1.53) | 11 (513) | 2.19 (1.01, 4.76) |
| Veneer/plywood mills | 21 (1,497) | 0.97 (0.56, 1.71) | 10 (598) | 1.24 (0.55, 2.80) |
| Sash, door and other millwork plants | 172 (15,309) | 0.84 (0.69, 1.02) | 19 (1,943) | 0.77 (0.42, 1.39) |
| Wooden box factories | 36 (3,137) | 1.02 (0.66, 1.57) | ≤5 cases (333) | - |
| Miscellaneous wood | 82 (5,593) | 1.11 (0.83, 1.47) | 17 (813) | 1.85 (0.99, 3.47) |
| Household furniture manufacturers | 172 (13,438) | 0.71 (0.58, 0.86) | 35 (3,168) | 0.62 (0.40, 0.96) |
| Office furniture manufacturers | 54 (4,666) | 0.89 (0.62, 1.26) | ≤5 cases (925) | - |
| Miscellaneous furniture/fixtures manufacturers | 83 (7,003) | 0.66 (0.50, 0.88) | 13 (1,354) | 0.54 (0.26, 1.10) |
| Pulp/paper mills | 155 (6,243) | 0.96 (0.78, 1.18) | ≤5 cases (320) | - |
| Asphalt roofing manufacturers | 9 (471) | 1.11 (0.47, 2.61) | 0 (10) | - |
| Paper box/bag manufacturers | 138 (7,919) | 0.98 (0.78, 1.22) | 50 (2,273) | 1.39 (0.97, 2.01) |
| Miscellaneous paper converters | 110 (5,716) | 1.07 (0.84, 1.37) | 54 (2,610) | 1.18 (0.83, 1.68) |
| Commercial printing | 185 (12,072) | 0.98 (0.81, 1.19) | 115 (5,551) | 1.43 (1.12, 1.82) |
| Platemaking, typesetting and trade bindery | 22 (1,143) | 1.45 (0.84, 2.52) | 17 (742) | 1.65 (0.88, 3.09) |
| Publishing only | 15 (1,515) | 0.67 (0.34, 1.30) | 13 (916) | 1.24 (0.61, 2.53) |
| Publishing/printing | 57 (2,901) | 1.08 (0.77, 1.52) | 31 (1,559) | 1.46 (0.92, 2.33) |
| Iron/steel mills | 631 (21,137) | 1.06 (0.96, 1.18) | 10 (558) | 1.23 (0.55, 2.78) |
| Steel pipe/tube mills | 58 (2,794) | 1.15 (0.82, 1.62) | ≤5 cases (238) | - |
| Iron foundries | 164 (5,895) | 1.28 (1.05, 1.57) | ≤5 cases (273) | - |
| Smelting/refining | 38 (953) | 1.17 (0.77, 1.78) | 0 (30) | - |
| Aluminum rolling, casting and extruding | 52 (2,744) | 1.10 (0.77, 1.58) | 11 (508) | 1.53 (0.71, 3.34) |
| Copper/copper alloy rolling, casting and extruding | 45 (1,830) | 1.03 (0.70, 1.52) | ≤5 cases (78) | - |
| Metal rolling, casting and extruding | 101 (4,880) | 1.15 (0.89, 1.49) | 16 (826) | 1.26 (0.66, 2.40) |
| Boiler/plate works | 55 (2,570) | 0.83 (0.58, 1.17) | ≤5 cases (92) | - |
| Fabricated structural metal | 167 (8,591) | 1.16 (0.95, 1.42) | ≤5 cases (233) | - |
| Ornamental/architectural metal | 144 (10,330) | 0.93 (0.75, 1.15) | 13 (801) | 1.28 (0.62, 2.61) |
| Metal stamping, pressing and coating | 436 (26,499) | 1.04 (0.92, 1.18) | 71 (4,769) | 1.04 (0.76, 1.41) |
| Wire/wire products manufacturers | 141 (7,732) | 1.05 (0.85, 1.31) | 38 (2,258) | 1.14 (0.75, 1.74) |
| Hardware, tool and cutlery manufacturers | 229 (16,765) | 1.00 (0.84, 1.19) | 57 (3,330) | 1.41 (1.00, 1.98) |
| Heating equipment manufacturers | 60 (2,574) | 1.15 (0.82, 1.60) | 10 (429) | 1.39 (0.62, 3.14) |
| Machine shops | 261 (17,080) | 1.05 (0.89, 1.23) | 20 (1,462) | 1.14 (0.64, 2.03) |
| Miscellaneous metal fabricating | 342 (22,382) | 0.98 (0.85, 1.13) | 88 (5,709) | 1.04 (0.79, 1.38) |
| Agricultural implement | 143 (4,321) | 1.22 (0.98, 1.51) | ≤5 cases (100) | - |
| Miscellaneous machinery/equipment manufacturers | 583 (29,690) | 1.00 (0.89, 1.11) | 52 (3,638) | 1.15 (0.81, 1.65) |
| Commercial refrigeration/air conditioning equipment manufacturers | 50 (1,752) | 1.34 (0.93, 1.93) | ≤5 cases (174) | - |
| Office/store machinery manufacturers | 13 (1,627) | 0.44 (0.22, 0.90) | 16 (809) | 1.35 (0.71, 2.57) |
| Aircraft/aircraft parts manufacturers | 215 (8,567) | 1.05 (0.88, 1.25) | 28 (1,207) | 1.36 (0.84, 2.22) |
| Motor vehicle manufacturers | 959 (38,432) | 0.94 (0.86, 1.02) | 132 (6,102) | 1.44 (1.15, 1.81) |
| Truck body/trailer manufacturers | 155 (10,013) | 1.11 (0.90, 1.37) | 11 (445) | 2.09 (0.96, 4.55) |
| Motor vehicle parts/accessories manufacturers | 811 (43,516) | 1.07 (0.98, 1.18) | 248 (16,181) | 1.29 (1.09, 1.52) |
| Railroad rolling stock | 67 (3,171) | 0.90 (0.66, 1.24) | 7 (221) | 1.86 (0.70, 4.93) |
| Shipbuilding/repair | 24 (898) | 1.05 (0.62, 1.77) | 0 (9) | - |
| Boatbuilding/repair | 31 (1,511) | 1.04 (0.66, 1.66) | ≤5 cases (136) | - |
| Miscellaneous vehicle manufacturers | 8 (405) | 1.20 (0.48, 2.97) | 0 (26) | - |
| Manufacturers of small electrical appliances | 28 (1,416) | 0.81 (0.50, 1.32) | 31 (1,520) | 1.37 (0.86, 2.18) |
| Manufacturers of major appliances (electric/non-electric) | 92 (3,744) | 1.08 (0.82, 1.41) | 29 (986) | 1.50 (0.93, 2.42) |
| Manufacturers of lighting fixtures | 19 (882) | 1.27 (0.71, 2.30) | 16 (771) | 1.07 (0.56, 2.04) |
| Manufacturers of household radio/television receivers | 18 (1,126) | 0.62 (0.34, 1.13) | 31 (1,305) | 0.99 (0.62, 1.58) |
| Communications equipment manufacturers | 76 (5,035) | 0.92 (0.68, 1.24) | 99 (4,818) | 1.16 (0.89, 1.50) |
| Manufacturers of electrical industrial equipment | 174 (6,783) | 1.14 (0.94, 1.39) | 73 (2,951) | 1.21 (0.89, 1.63) |
| Manufacturers of electric wire/cable | 46 (1,432) | 1.56 (1.07, 2.28) | 7 (377) | 1.90 (0.72, 5.04) |
| Manufacturers of miscellaneous electrical products | 49 (3,080) | 0.80 (0.55, 1.15) | 50 (2,807) | 1.19 (0.83, 1.72) |
| Clay products manufacturers | 21 (1,285) | 0.83 (0.47, 1.45) | ≤5 cases (316) | - |
| Cement manufacturers | 19 (829) | 0.98 (0.54, 1.77) | 0 (12) | - |
| Stone products manufacturers | 13 (520) | 1.42 (0.69, 2.89) | ≤5 cases (23) | - |
| Concrete products manufacturers | 115 (5,706) | 1.19 (0.93, 1.51) | ≤5 cases (94) | - |
| Ready-mix concrete manufacturers | 118 (3,191) | 1.66 (1.31, 2.10) | ≤5 cases (38) | - |
| Glass/glass products manufacturers | 124 (5,867) | 1.10 (0.88, 1.39) | 34 (1,663) | 1.06 (0.68, 1.65) |
| Abrasives manufacturers | 33 (961) | 1.32 (0.84, 2.06) | ≤5 cases (149) | - |
| Miscellaneous non-metallic mineral products | 94 (3,998) | 1.26 (0.97, 1.64) | 6 (411) | 0.88 (0.31, 2.52) |
| Petroleum refineries | 13 (810) | 0.69 (0.34, 1.41) | 0 (82) | - |
| Manufacturers of mixed fertilizers | 8 (529) | 1.02 (0.41, 2.52) | 0 (40) | - |
| Manufacturers of plastics/synthetic resins | 26 (1,952) | 1.19 (0.72, 1.98) | ≤5 cases (312) | - |
| Manufacturers of pharmaceuticals/medicines | 45 (2,340) | 1.33 (0.91, 1.95) | 39 (2,442) | 1.10 (0.73, 1.66) |
| Paint/varnish manufacturers | 32 (1,814) | 0.88 (0.56, 1.39) | ≤5 cases (240) | - |
| Manufacturers of soap/cleaning compounds | 8 (1,073) | 0.41 (0.16, 1.02) | 13 (615) | 1.33 (0.65, 2.72) |
| Manufacturers of toilet preparations | 11 (807) | 0.88 (0.41, 1.92) | 17 (1,219) | 0.83 (0.45, 1.56) |
| Manufacturers of industrial chemicals | 69 (2,590) | 1.03 (0.75, 1.40) | ≤5 cases (264) | - |
| Miscellaneous chemical | 69 (4,614) | 0.85 (0.63, 1.16) | 15 (1,069) | 0.86 (0.44, 1.68) |
| Scientific/professional equipment | 47 (3,033) | 0.76 (0.53, 1.11) | 54 (2,673) | 1.13 (0.80, 1.61) |
| Jewelry/silverware | 23 (990) | 1.20 (0.70, 2.06) | ≤5 cases (467) | - |
| Sporting goods/toy | 24 (1,993) | 0.84 (0.50, 1.42) | 29 (1,617) | 1.10 (0.68, 1.77) |
| Signs/displays | 52 (3,354) | 1.13 (0.79, 1.62) | ≤5 cases (413) | - |
| Miscellaneous manufacturing | 82 (4,632) | 1.10 (0.83, 1.47) | 31 (2,407) | 0.94 (0.59, 1.50) |
| Building construction | 857 (45,768) | 1.03 (0.94, 1.12) | 40 (3,680) | 1.03 (0.68, 1.54) |
| Highway, bridge and street construction | 308 (12,531) | 1.61 (1.39, 1.87) | ≤5 cases (321) | - |
| Other construction | 270 (13,658) | 1.32 (1.13, 1.55) | ≤5 cases (340) | - |
| Air transport | 119 (11,371) | 0.56 (0.44, 0.71) | 28 (5,189) | 0.59 (0.36, 0.96) |
| Services incidental to air transport | 18 (3,627) | 0.70 (0.38, 1.28) | 6 (884) | 1.32 (0.46, 3.79) |
| Railway transport | 203 (9,594) | 0.92 (0.77, 1.10) | 6 (906) | 0.66 (0.23, 1.88) |
| Water transport | 36 (2,090) | 0.83 (0.54, 1.28) | ≤5 cases (196) | - |
| Services incidental to water transport | 52 (1,661) | 0.99 (0.69, 1.42) | ≤5 cases (88) | - |
| Moving/storage, used goods, uncrated | 71 (4,850) | 0.98 (0.72, 1.33) | ≤5 cases (162) | - |
| Other truck transport | 1,521 (63,511) | 1.55 (1.45, 1.66) | 33 (3,530) | 1.43 (0.91, 2.24) |
| Bus transport, interurban/rural | 30 (1,230) | 0.98 (0.61, 1.57) | ≤5 cases (235) | - |
| Urban transit systems | 189 (10,596) | 1.02 (0.85, 1.24) | 23 (1,896) | 1.48 (0.87, 2.54) |
| Taxicab operations | 30 (999) | 1.69 (1.06, 2.71) | 7 (367) | 1.52 (0.57, 4.02) |
| Highway/bridge maintenance | 17 (1,308) | 1.11 (0.60, 2.08) | ≤5 cases (73) | - |
| Miscellaneous services incidental to transport | 57 (6,609) | 1.16 (0.82, 1.63) | 6 (1,189) | 0.91 (0.32, 2.62) |
| Other transportation | 90 (4,475) | 1.27 (0.97, 1.67) | 69 (4,310) | 1.58 (1.16, 2.15) |
| Grain elevators | 30 (1,025) | 1.06 (0.66, 1.70) | 0 (30) | - |
| Other storage/warehousing | 97 (8,153) | 1.29 (0.99, 1.68) | 9 (1,424) | 1.22 (0.52, 2.89) |
| Radio/television broadcasting | 30 (2,410) | 0.85 (0.53, 1.36) | ≤5 cases (706) | - |
| Telephone systems | 20 (1,455) | 0.55 (0.31, 0.97) | 8 (420) | 0.89 (0.36, 2.23) |
| Post office | 291 (16,001) | 0.91 (0.78, 1.06) | 140 (9,684) | 1.09 (0.88, 1.36) |
| Electric power | 261 (12,142) | 0.99 (0.85, 1.16) | 18 (1,541) | 1.00 (0.54, 1.83) |
| Gas distribution | 44 (1,567) | 1.18 (0.80, 1.74) | 7 (307) | 1.64 (0.62, 4.35) |
| Water systems | 12 (729) | 0.70 (0.33, 1.48) | ≤5 cases (64) | - |
| Other utilities | 71 (5,832) | 1.16 (0.85, 1.57) | ≤5 cases (340) | - |
| Wholesalers of farm products | 17 (1,086) | 0.94 (0.50, 1.75) | ≤5 cases (268) | - |
| Wholesalers of coal/coke | 6 (106) | 1.29 (0.45, 3.69) | 0 (6) | - |
| Wholesalers of petroleum products | 81 (3,798) | 1.39 (1.04, 1.85) | ≤5 cases (255) | - |
| Wholesalers of paper/paper products | 36 (2,203) | 1.05 (0.68, 1.61) | 14 (571) | 1.99 (1.00, 3.97) |
| Wholesalers of food | 232 (18,248) | 0.98 (0.83, 1.16) | 55 (3,977) | 1.06 (0.75, 1.50) |
| Wholesalers of tobacco products | 9 (896) | 1.07 (0.45, 2.52) | ≤5 cases (99) | - |
| Wholesalers of drugs/toilet preparations | 20 (1,086) | 1.22 (0.69, 2.18) | 11 (1,100) | 0.77 (0.35, 1.68) |
| Wholesalers of apparel/dry goods | 14 (1,177) | 0.82 (0.41, 1.63) | 23 (1,301) | 1.15 (0.67, 1.96) |
| Wholesalers of household furniture/furnishings | 14 (1,129) | 1.08 (0.54, 2.16) | ≤5 cases (275) | - |
| Wholesalers of motor vehicles/accessories | 201 (12,913) | 0.99 (0.82, 1.19) | 32 (2,060) | 1.40 (0.89, 2.21) |
| Wholesalers of electrical machinery, equipment and supplies | 56 (4,696) | 0.97 (0.69, 1.37) | 19 (1,573) | 1.06 (0.59, 1.91) |
| Wholesalers of farm machinery/equipment | 48 (2,987) | 1.13 (0.78, 1.64) | ≤5 cases (128) | - |
| Wholesalers of machinery/equipment, NEC | 250 (17,965) | 1.05 (0.89, 1.23) | 38 (2,620) | 1.40 (0.92, 2.13) |
| Wholesalers of hardware, plumbing and heating equipment | 82 (6,118) | 1.05 (0.79, 1.40) | 24 (1,337) | 1.38 (0.82, 2.34) |
| Wholesalers of metal/metal products, NEC | 63 (4,010) | 1.07 (0.77, 1.48) | ≤5 cases (225) | - |
| Wholesalers of lumber/building materials | 238 (22,493) | 0.93 (0.78, 1.09) | 25 (3,500) | 1.44 (0.86, 2.41) |
| Wholesalers of scrap/waste materials, NEC | 136 (7,651) | 1.39 (1.12, 1.74) | ≤5 cases (315) | - |
| Wholesalers, NEC | 229 (19,779) | 0.97 (0.82, 1.16) | 99 (7,585) | 1.22 (0.94, 1.58) |
| Food stores | 447 (43,106) | 0.89 (0.79, 1.01) | 444 (37,580) | 1.18 (1.04, 1.33) |
| General merchandise stores | 220 (21,064) | 0.73 (0.62, 0.87) | 526 (28,782) | 1.14 (1.01, 1.28) |
| Tire, battery and accessories stores | 76 (8,032) | 0.81 (0.60, 1.08) | 34 (2,240) | 1.46 (0.94, 2.27) |
| Gasoline service stations | 171 (12,991) | 0.80 (0.66, 0.98) | 26 (2,714) | 0.99 (0.60, 1.64) |
| Motor vehicle dealers | 346 (26,147) | 1.07 (0.93, 1.23) | 26 (3,195) | 1.18 (0.71, 1.96) |
| Motor vehicle repair shops | 423 (32,720) | 1.03 (0.91, 1.17) | 53 (3,734) | 1.33 (0.94, 1.90) |
| Shoe stores | 9 (715) | 0.81 (0.34, 1.91) | 19 (1,453) | 1.02 (0.56, 1.84) |
| Men's clothing stores | 18 (847) | 1.20 (0.66, 2.21) | 11 (1,153) | 0.51 (0.23, 1.11) |
| Women's clothing stores | ≤5 cases (424) | - | 22 (2,968) | 0.88 (0.51, 1.53) |
| Clothing/dry goods stores, NEC | 10 (1,417) | 1.01 (0.45, 2.29) | 33 (4,515) | 0.94 (0.60, 1.47) |
| Hardware stores | 36 (2,319) | 1.10 (0.72, 1.69) | 13 (732) | 1.37 (0.67, 2.79) |
| Household furniture/appliance stores | 85 (9,399) | 0.81 (0.61, 1.07) | 28 (2,313) | 1.31 (0.80, 2.13) |
| Radio, television and electrical appliance repair shops | 16 (1,020) | 0.90 (0.47, 1.71) | ≤5 cases (266) | - |
| Drug stores | 17 (2,502) | 0.78 (0.42, 1.45) | 62 (5,449) | 1.17 (0.84, 1.62) |
| Book/stationery stores | 8 (1,174) | 1.08 (0.44, 2.69) | 12 (1,526) | 1.20 (0.57, 2.53) |
| Florist shops | 10 (776) | 1.22 (0.54, 2.75) | 9 (950) | 0.78 (0.33, 1.85) |
| Liquor, wine and beer stores | 76 (5,283) | 0.85 (0.63, 1.15) | 37 (3,069) | 1.69 (1.11, 2.59) |
| Tobacconists | ≤5 cases (75) | - | 8 (184) | 1.85 (0.74, 4.59) |
| Retail stores, NEC | 174 (16,681) | 0.96 (0.79, 1.17) | 110 (12,839) | 1.09 (0.85, 1.40) |
| Banks/other deposit accepting establishments | 8 (369) | 0.82 (0.33, 2.04) | 14 (754) | 0.73 (0.37, 1.45) |
| Investment/holding companies | 52 (2,456) | 0.98 (0.68, 1.40) | 6 (628) | 0.62 (0.22, 1.77) |
| Insurance carriers | 6 (229) | 1.00 (0.35, 2.86) | 13 (468) | 1.32 (0.65, 2.71) |
| Insurance/real estate agencies | 6 (557) | 0.71 (0.25, 2.01) | ≤5 cases (286) | - |
| Real estate operators | 276 (11,248) | 1.34 (1.15, 1.57) | 95 (6,368) | 1.17 (0.90, 1.53) |
| Kindergartens/nursery schools | 11 (280) | 1.11 (0.51, 2.41) | 27 (998) | 1.11 (0.68, 1.83) |
| Elementary/secondary schools | 577 (21,488) | 1.01 (0.90, 1.12) | 410 (31,953) | 0.80 (0.71, 0.91) |
| Vocational centres, trade schools and business colleges | 7 (1,624) | 1.11 (0.42, 2.92) | ≤5 cases (803) | - |
| Post-secondary/non-university educational institutions | 22 (2,263) | 0.59 (0.34, 1.02) | 19 (1,844) | 0.68 (0.38, 1.22) |
| Universities/colleges | 105 (7,155) | 0.87 (0.68, 1.12) | 73 (7,111) | 0.77 (0.57, 1.04) |
| Libraries, museums and other repositories | 16 (683) | 1.53 (0.80, 2.91) | 14 (1,406) | 0.81 (0.41, 1.62) |
| Education and related services, NEC | 65 (8,571) | 1.72 (1.25, 2.37) | 85 (17,779) | 1.43 (1.08, 1.89) |
| Hospitals | 335 (16,277) | 0.94 (0.82, 1.08) | 822 (66,531) | 0.76 (0.69, 0.84) |
| Related health care institutions | 36 (2,776) | 1.57 (1.02, 2.41) | 334 (28,651) | 1.11 (0.96, 1.29) |
| Offices of physicians/surgeons | 9 (418) | 1.03 (0.43, 2.42) | 18 (1,567) | 1.05 (0.57, 1.92) |
| Offices of para-medical personnel (practitioners) | ≤5 cases (211) | - | 37 (2,741) | 1.64 (1.07, 2.51) |
| Diagnostic/therapeutic services, NEC | 9 (627) | 1.40 (0.59, 3.31) | 48 (4,118) | 0.99 (0.69, 1.44) |
| Miscellaneous health services | 12 (1,685) | 1.02 (0.49, 2.15) | 88 (10,084) | 1.48 (1.12, 1.94) |
| Welfare organizations | 106 (7,700) | 1.01 (0.79, 1.30) | 603 (42,072) | 1.15 (1.03, 1.28) |
| Religious organizations | 18 (674) | 1.16 (0.63, 2.13) | 8 (790) | 0.70 (0.28, 1.74) |
| Motion picture production/distribution | 9 (988) | 1.03 (0.44, 2.43) | ≤5 cases (306) | - |
| Bowling alleys/billiard parlors | 6 (243) | 1.38 (0.48, 3.96) | ≤5 cases (96) | - |
| Golf clubs/country clubs | 27 (2,331) | 0.93 (0.57, 1.52) | 15 (1,103) | 1.28 (0.66, 2.49) |
| Miscellaneous amusement/recreation services | 79 (7,590) | 1.07 (0.80, 1.43) | 49 (6,296) | 1.31 (0.90, 1.89) |
| Employment agencies/personnel suppliers | 314 (31,687) | 1.41 (1.22, 1.64) | 98 (10,716) | 1.38 (1.06, 1.79) |
| Computer services | 10 (813) | 1.46 (0.65, 3.29) | ≤5 cases (389) | - |
| Security/investigation services | 195 (14,411) | 1.11 (0.93, 1.34) | 40 (3,505) | 1.28 (0.85, 1.92) |
| Offices of accountants | 8 (386) | 1.21 (0.49, 3.01) | 12 (851) | 1.41 (0.67, 2.96) |
| Advertising services | 20 (1,565) | 1.27 (0.72, 2.26) | 14 (925) | 1.96 (0.98, 3.90) |
| Engineering/scientific services | 64 (5,694) | 0.86 (0.63, 1.19) | 23 (2,028) | 1.19 (0.69, 2.04) |
| Offices of management/business consultants | 11 (968) | 0.90 (0.42, 1.96) | 24 (947) | 1.19 (0.70, 2.01) |
| Miscellaneous services to business management | 149 (12,338) | 1.20 (0.97, 1.48) | 76 (7,981) | 1.09 (0.81, 1.46) |
| Private households | 11 (707) | 1.64 (0.75, 3.55) | 31 (2,546) | 1.69 (1.06, 2.69) |
| Laundries, cleaners and pressers (except self-service) | 43 (3,442) | 0.86 (0.58, 1.27) | 52 (3,420) | 0.86 (0.60, 1.23) |
| Funeral services | 23 (930) | 1.23 (0.72, 2.11) | 0 (134) | - |
| Miscellaneous personal services | 24 (719) | 1.96 (1.16, 3.31) | ≤5 cases (246) | - |
| Hotels/motels | 158 (11,592) | 0.84 (0.69, 1.04) | 226 (16,284) | 0.94 (0.79, 1.12) |
| Lodging houses/residential clubs | ≤5 cases (148) | - | 6 (390) | 2.11 (0.74, 6.05) |
| Camping grounds and trailer parks | 9 (640) | 1.30 (0.55, 3.06) | ≤5 cases (371) | - |
| Restaurants, caterers and taverns | 365 (55,815) | 0.67 (0.58, 0.77) | 677 (70,138) | 1.05 (0.95, 1.17) |
| Labour organizations/trade associations | 16 (1,162) | 0.85 (0.44, 1.61) | 36 (3,673) | 1.08 (0.70, 1.66) |
| Photographic services, NEC | 6 (368) | 0.86 (0.30, 2.47) | 11 (458) | 1.98 (0.91, 4.31) |
| Automobile/truck rental | 42 (3,128) | 1.38 (0.92, 2.05) | ≤5 cases (494) | - |
| Machinery/equipment rental | 74 (4,458) | 1.38 (1.02, 1.86) | ≤5 cases (343) | - |
| Blacksmithing/welding shops | 71 (3,673) | 1.26 (0.93, 1.71) | 0 (77) | - |
| Miscellaneous repair shops | 40 (2,739) | 1.09 (0.73, 1.64) | ≤5 cases (203) | - |
| Services to buildings/dwellings | 163 (12,251) | 1.02 (0.83, 1.24) | 116 (9,389) | 0.84 (0.66, 1.06) |
| Miscellaneous services, NEC | 136 (8,941) | 1.66 (1.33, 2.07) | 124 (8,793) | 1.38 (1.10, 1.74) |
| Defense services | 137 (3,516) | 1.48 (1.19, 1.84) | 50 (2,220) | 1.18 (0.82, 1.70) |
| Other federal administration | 343 (15,059) | 0.94 (0.81, 1.08) | 183 (12,541) | 1.13 (0.93, 1.37) |
| Provincial administration | 475 (25,421) | 1.00 (0.89, 1.13) | 268 (18,366) | 1.10 (0.94, 1.29) |
| Local administration | 1,361 (74,081) | 1.05 (0.98, 1.13) | 339 (35,678) | 1.00 (0.87, 1.15) |
| Other government offices | 314 (9,854) | 1.00.16 (1, 1.34) | 48 (2,329) | 0.93 (0.64, 1.35) |

**Table 6. Hazard ratios for lung cancer among all occupations, minor level**

|  | **Male** |  | **Female** |  |
| --- | --- | --- | --- | --- |
| **Occupation** | **Cases**  **(# of workers)** | **Hazard Ratio**  **(99% CI)** | **Cases**  **(# of workers)** | **Hazard Ratio**  **(99% CI)** |
| Government administrators | 10 (359) | 1.37 (0.61, 3.09) | 8 (461) | 1.33 (0.53, 3.30) |
| Inspectors/regulatory officers, government | 32 (1,327) | 0.69 (0.44, 1.09) | 10 (587) | 0.98 (0.43, 2.22) |
| Officials/administrators unique to government, NEC | 7 (1,150) | 0.79 (0.30, 2.10) | 12 (1,945) | 1.48 (0.70, 3.11) |
| General managers/other senior officials | 14 (519) | 0.72 (0.36, 1.42) | ≤5 cases (312) | - |
| Production management | 12 (926) | 1.42 (0.67, 2.98) | ≤5 cases (199) | - |
| Management, construction operations | 15 (782) | 1.06 (0.54, 2.06) | ≤5 cases (57) | - |
| Other Managers/administrators, NEC | 31 (2,447) | 1.37 (0.86, 2.18) | 35 (2,270) | 1.10 (0.71, 1.70) |
| Accountants, auditors/other financial officers | 11 (854) | 0.74 (0.34, 1.60) | 13 (1,445) | 0.99 (0.49, 2.03) |
| Personnel and related officers | ≤5 cases (264) | - | 10 (814) | 1.60 (0.71, 3.61) |
| Inspectors/regulatory officers, non-government | 12 (1,645) | 1.20 (0.57, 2.52) | 7 (934) | 2.47 (0.93, 6.54) |
| Management/administration, NEC | 16 (1,446) | 1.32 (0.69, 2.52) | 35 (4,458) | 1.39 (0.90, 2.15) |
| Physical sciences technologists/technicians | 19 (1,845) | 0.57 (0.31, 1.02) | ≤5 cases (436) | - |
| Agriculturists and related scientists | 10 (731) | 0.71 (0.31, 1.59) | ≤5 cases (129) | - |
| Life sciences technologists/technicians | 9 (691) | 1.42 (0.60, 3.36) | 0 (375) | - |
| Civil engineers | 7 (711) | 0.60 (0.23, 1.59) | ≤5 cases (91) | - |
| Electrical engineers | 10 (730) | 0.98 (0.43, 2.21) | ≤5 cases (128) | - |
| Industrial engineers | 11 (585) | 0.97 (0.45, 2.11) | ≤5 cases (238) | - |
| Mechanical engineers | 14 (724) | 1.01 (0.51, 2.01) | 0 (51) | - |
| Architects/engineers, NEC | 8 (464) | 0.91 (0.37, 2.26) | 0 (132) | - |
| Surveyors | 14 (1,457) | 0.60 (0.30, 1.19) | ≤5 cases (96) | - |
| Architectural/engineering technologists/technicians | 93 (8,806) | 0.96 (0.74, 1.26) | 17 (1,902) | 1.57 (0.84, 2.94) |
| Architecture/engineering, NEC | 22 (1,160) | 0.96 (0.55, 1.66) | ≤5 cases (97) | - |
| Mathematicians, statisticians and actuaries | 0 (64) | - | 7 (138) | 3.39 (1.28, 8.97) |
| Systems analysts, computer programmers and related | 9 (1,292) | 1.19 (0.50, 2.80) | 7 (1,026) | 1.18 (0.45, 3.14) |
| Psychologists | ≤5 cases (294) | - | 21 (1,205) | 1.13 (0.64, 1.98) |
| Social workers | 18 (1,157) | 1.19 (0.65, 2.18) | 39 (4,374) | 0.94 (0.62, 1.43) |
| Welfare/community services | 45 (4,204) | 1.16 (0.79, 1.71) | 120 (14,824) | 1.14 (0.90, 1.44) |
| Social work and related fields, NEC | ≤5 cases (190) | - | 9 (600) | 1.23 (0.52, 2.91) |
| Social sciences and related fields, NEC | ≤5 cases (662) | - | 8 (2,331) | 0.95 (0.38, 2.36) |
| University teaching and related, NEC | ≤5 cases (195) | - | 9 (1,441) | 1.58 (0.67, 3.72) |
| Elementary/kindergarten teachers | 30 (4,140) | 0.55 (0.34, 0.88) | 124 (19,088) | 0.61 (0.49, 0.77) |
| Secondary school teachers | 26 (3,237) | 0.47 (0.28, 0.77) | 47 (6,486) | 0.50 (0.34, 0.73) |
| Elementary/secondary school teaching and related, NEC | ≤5 cases (1,357) | - | 77 (11,374) | 0.94 (0.70, 1.26) |
| Teachers of exceptional students, NEC | 0 (137) | - | 6 (724) | 0.94 (0.33, 2.68) |
| Other teaching and related, NEC | 6 (552) | 0.79 (0.28, 2.25) | 10 (1,032) | 0.85 (0.38, 1.92) |
| Supervisors: nursing | ≤5 cases (133) | - | 11 (884) | 0.67 (0.31, 1.46) |
| Nurses, registered, graduate/nurses-in-training | 17 (2,381) | 0.57 (0.31, 1.07) | 331 (39,928) | 0.66 (0.57, 0.76) |
| Nursing assistants | 24 (1,592) | 0.77 (0.45, 1.30) | 286 (17,898) | 0.99 (0.85, 1.16) |
| Nursing aides/orderlies | 79 (5,937) | 0.88 (0.66, 1.18) | 645 (49,950) | 1.00 (0.90, 1.11) |
| Physiotherapists, occupational/other therapists | ≤5 cases (231) | - | 16 (1,644) | 1.03 (0.54, 1.96) |
| Nursing, therapy and related assisting, NEC | 48 (6,006) | 0.85 (0.59, 1.24) | 97 (9,700) | 1.38 (1.06, 1.79) |
| Dietitians/nutritionists | ≤5 cases (78) | - | 11 (625) | 1.28 (0.59, 2.79) |
| Radiological technologists/technicians | ≤5 cases (242) | - | 9 (1,063) | 1.00 (0.43, 2.37) |
| Medical laboratory technologists/technicians | 10 (1,172) | 0.73 (0.32, 1.64) | 43 (5,881) | 1.07 (0.72, 1.59) |
| Medicine/health, NEC | ≤5 cases (599) | - | 15 (2,197) | 1.04 (0.54, 2.03) |
| Product/interior designers | 7 (321) | 1.32 (0.50, 3.50) | ≤5 cases (495) | - |
| Fine/commercial art, photography and related fields, NEC | 9 (503) | 3.73 (1.58, 8.80) | ≤5 cases (200) | - |
| Performing/audio-visual arts, NEC | 8 (1,282) | 0.94 (0.38, 2.33) | ≤5 cases (431) | - |
| Coaches, trainers, instructors and managers, sport/recreation | 9 (1,350) | 0.79 (0.34, 1.86) | ≤5 cases (2,150) | - |
| Attendants, sport/recreation | 48 (3,368) | 1.33 (0.92, 1.93) | 16 (2,085) | 1.94 (1.02, 3.69) |
| Secretaries/stenographers | ≤5 cases (192) | - | 145 (8,141) | 1.04 (0.84, 1.29) |
| Typists/clerk-typists | ≤5 cases (95) | - | 37 (2,270) | 0.81 (0.53, 1.24) |
| Supervisors: bookkeeping, account-recording/related | ≤5 cases (129) | - | 8 (490) | 1.63 (0.66, 4.06) |
| Bookkeepers/accounting clerks | 17 (712) | 1.03 (0.55, 1.93) | 94 (3,988) | 1.21 (0.93, 1.58) |
| Tellers/cashiers | 16 (2,493) | 0.76 (0.40, 1.44) | 313 (23,510) | 1.36 (1.17, 1.58) |
| Bookkeeping, account-recording and related, NEC | ≤5 cases (312) | - | 17 (2,107) | 1.60 (0.86, 3.00) |
| Office machine operators | 7 (260) | 1.57 (0.59, 4.15) | 10 (376) | 1.26 (0.56, 2.84) |
| Electronic data-processing equipment operators | 9 (702) | 1.05 (0.45, 2.48) | 33 (2,983) | 0.86 (0.55, 1.35) |
| Supervisors: material recording, scheduling and distributing | 36 (2,433) | 1.54 (1.00, 2.37) | 11 (728) | 2.00 (0.92, 4.35) |
| Production clerks | 63 (3,268) | 1.15 (0.83, 1.59) | 25 (1,599) | 1.21 (0.72, 2.03) |
| Shipping/receiving clerks | 527 (37,563) | 1.07 (0.95, 1.19) | 92 (5,833) | 1.54 (1.17, 2.01) |
| Stock clerks and related | 294 (15,648) | 1.16 (0.99, 1.34) | 90 (5,113) | 1.27 (0.97, 1.67) |
| Weighers | 7 (313) | 1.00 (0.38, 2.64) | 0 (73) | - |
| Material recording, scheduling and distributing, NEC | 29 (1,919) | 0.99 (0.61, 1.59) | 23 (1,188) | 1.00 (0.59, 1.72) |
| Library/file clerks | ≤5 cases (212) | - | 16 (1,475) | 0.58 (0.30, 1.10) |
| Supervisors: reception, information, mail and message distribution | 9 (448) | 0.98 (0.41, 2.31) | 6 (329) | 1.23 (0.43, 3.53) |
| Receptionists/information clerks | ≤5 cases (224) | - | 49 (3,364) | 1.39 (0.96, 2.01) |
| Telephone operators | 0 (74) | - | 18 (699) | 1.29 (0.70, 2.36) |
| Messengers | 45 (5,520) | 1.27 (0.87, 1.87) | 14 (1,287) | 1.79 (0.90, 3.57) |
| Reception, information, mail and message distribution, NEC | ≤5 cases (175) | - | 16 (475) | 1.52 (0.80, 2.90) |
| Travel clerks, ticket, station/freight agents | 6 (1,523) | 0.26 (0.09, 0.75) | 10 (1,937) | 0.68 (0.30, 1.54) |
| General office clerks | 25 (1,777) | 0.91 (0.54, 1.52) | 150 (10,806) | 1.12 (0.91, 1.39) |
| Other clerical and related, NEC | 69 (6,548) | 1.06 (0.77, 1.44) | 136 (12,592) | 1.32 (1.06, 1.65) |
| Supervisors: sales, commodities | 163 (12,271) | 0.85 (0.69, 1.04) | 150 (13,664) | 1.28 (1.03, 1.58) |
| Commercial travellers | 35 (1,163) | 1.16 (0.75, 1.80) | ≤5 cases (374) | - |
| Salesmen/salespersons, commodities, NEC | 182 (37,470) | 1.31 (1.08, 1.59) | 320 (40,036) | 2.10 (1.81, 2.44) |
| Sales clerks, commodities | 194 (15,970) | 0.75 (0.62, 0.90) | 393 (21,275) | 0.90 (0.79, 1.03) |
| Service station attendants | 29 (2,186) | 1.12 (0.70, 1.81) | ≤5 cases (569) | - |
| Sales: commodities, NEC | 7 (277) | 1.37 (0.52, 3.62) | ≤5 cases (274) | - |
| Sales: services, NEC | 11 (269) | 1.57 (0.72, 3.41) | ≤5 cases (80) |  |
| Buyers, wholesale/retail trade | 6 (1,178) | 1.86 (0.65, 5.33) | 11 (1,980) | 1.79 (0.82, 3.88) |
| Driver-salesmen | 62 (2,877) | 0.91 (0.65, 1.26) | ≤5 cases (105) | - |
| Other sales, NEC | ≤5 cases (918) | - | 10 (1,213) | 2.16 (0.96, 4.88) |
| Policemen/detectives, government | 168 (18,881) | 0.68 (0.56, 0.83) | 12 (3,535) | 0.63 (0.30, 1.33) |
| Guards/watchmen | 355 (17,431) | 1.29 (1.13, 1.48) | 71 (6,448) | 1.25 (0.92, 1.70) |
| Protective service, NEC | 6 (618) | 0.61 (0.21, 1.73) | ≤5 cases (545) | - |
| Supervisors: food/beverage preparation and related service | 46 (4,057) | 0.85 (0.58, 1.24) | 93 (7,153) | 1.28 (0.98, 1.68) |
| Chefs/cooks | 191 (27,246) | 0.71 (0.59, 0.86) | 331 (18,882) | 1.27 (1.10, 1.47) |
| Bartenders | 31 (1,871) | 1.24 (0.78, 1.97) | 41 (2,560) | 2.01 (1.35, 3.02) |
| Waiters, hostesses and stewards, food/beverage | 46 (5,893) | 0.72 (0.49, 1.05) | 275 (26,145) | 1.01 (0.86, 1.18) |
| Food/beverage preparation and related service, NEC | 67 (14,828) | 0.81 (0.59, 1.11) | 364 (30,207) | 1.10 (0.96, 1.27) |
| Supervisors: lodging/other accommodation | 20 (659) | 1.29 (0.72, 2.29) | 50 (2,335) | 0.78 (0.54, 1.13) |
| Managers: hotel, motel and other accommodation | 10 (192) | 1.73 (0.77, 3.91) | 17 (664) | 0.92 (0.49, 1.72) |
| Chambermaids/housemen | 6 (515) | 0.45 (0.16, 1.29) | 53 (2,646) | 0.83 (0.58, 1.18) |
| Sleeping-car/baggage porters and bellmen | 11 (536) | 1.13 (0.52, 2.45) | ≤5 cases (70) | - |
| Lodging/other accommodation, NEC | 6 (834) | 1.52 (0.53, 4.35) | 6 (433) | 2.40 (0.84, 6.86) |
| Hostesses/stewards, except food/beverage | 8 (943) | 0.81 (0.33, 2.01) | 17 (3,141) | 0.55 (0.29, 1.03) |
| Babysitters | ≤5 cases (73) | - | 9 (1,085) | 1.90 (0.81, 4.49) |
| Personal service, NEC | 40 (3226) | 1.18 (0.79, 1.77) | 444 (32,163) | 1.28 (1.13, 1.45) |
| Pressing | 8 (381) | 1.04 (0.42, 2.58) | 24 (1,279) | 0.84 (0.49, 1.42) |
| Apparel/furnishings service, NEC | 10 (508) | 1.15 (0.51, 2.59) | ≤5 cases (235) | - |
| Supervisors: other service | 93 (3,618) | 1.46 (1.12, 1.91) | 33 (1,581) | 2.13 (1.36, 3.34) |
| Labouring and other elemental work (LOEW): Services | 180 (16,318) | 0.74 (0.61, 0.90) | 245 (12,598) | 0.89 (0.75, 1.05) |
| Other service, NEC | 40 (3,479) | 1.20 (0.80, 1.80) | 13 (909) | 1.87 (0.92, 3.83) |
| Farmers | 17 (1,553) | 0.48 (0.26, 0.89) | ≤5 cases (391) | - |
| Foremen: other farming, horticultural and animal husbandry | 22 (1,938) | 0.98 (0.57, 1.70) | ≤5 cases (461) | - |
| Farm workers | 195 (16,201) | 0.81 (0.67, 0.98) | 41 (5,092) | 0.68 (0.45, 1.02) |
| Nursery and related workers | 243 (19,116) | 1.10 (0.94, 1.30) | 29 (3,854) | 1.05 (0.65, 1.70) |
| Other farming, horticultural and animal husbandry, NEC | 24 (1,700) | 0.91 (0.54, 1.54) | 7 (1,568) | 0.75 (0.28, 1.98) |
| Fishermen: net, trap/line | 9 (374) | 1.21 (0.51, 2.85) | 0 (12) | - |
| Timber cutting and related | 145 (5,770) | 1.08 (0.87, 1.34) | 0 (71) | - |
| Log hoisting, sorting, moving and related | 56 (1,952) | 1.50 (1.06, 2.12) | ≤5 cases (21) | - |
| LOEW: forestry/logging | 21 (1,913) | 0.88 (0.50, 1.55) | ≤5 cases (380) | - |
| Forestry/logging, NEC | 11 (516) | 0.92 (0.42, 2.00) | ≤5 cases (22) | - |
| Foremen: mining/quarrying including oil/gas field | 35 (855) | 1.27 (0.82, 1.96) | ≤5 cases (11) | - |
| Other rock/soil-drilling | 156 (3,317) | 1.60 (1.30, 1.97) | 0 (5) | - |
| Blasting | 10 (175) | 1.72 (0.76, 3.89) | 0 (0) | - |
| Mining/quarrying: cutting, handling and loading | 199 (4,910) | 1.60 (1.33, 1.93) | 0 (41) | - |
| LOEW: mining/quarrying including oil/gas fields | 39 (1,918) | 0.88 (0.59, 1.34) | ≤5 cases (40) | - |
| Mining/quarrying including oil/gas field, NEC | 96 (3,673) | 2.47 (1.90, 3.22) | ≤5 cases (48) | - |
| Crushing/grinding, mineral ores | 12 (267) | 1.52 (0.72, 3.20) | 0 (12) | - |
| Mixing, separating, filtering and related, mineral ores | 6 (115) | 1.71 (0.60, 4.89) | 0 (6) | - |
| LOEW: mineral ore treating | 20 (484) | 1.66 (0.93, 2.95) | ≤5 cases (18) | - |
| Foremen: metal processing and related | 43 (1,084) | 1.72 (1.16, 2.54) | 0 (47) | - |
| Metal smelting, converting and refining furnacemen | 68 (2,208) | 1.14 (0.84, 1.56) | ≤5 cases (102) | - |
| Metal heat treating | 13 (404) | 1.59 (0.78, 3.25) | ≤5 cases (21) | - |
| Metal rolling | 19 (940) | 0.78 (0.43, 1.42) | ≤5 cases (55) | - |
| Moulding, coremaking and metal casting | 157 (6,580) | 1.44 (1.17, 1.77) | 7 (515) | 1.16 (0.44, 3.08) |
| Metal extruding and drawing | 13 (499) | 1.21 (0.59, 2.48) | ≤5 cases (43) | - |
| Plating, metal spraying and related | 27 (1,443) | 1.53 (0.93, 2.51) | ≤5 cases (189) | - |
| LOEW: metal processing | 108 (4,284) | 1.03 (0.80, 1.32) | 9 (309) | 1.47 (0.62, 3.47) |
| Metal processing and related, NEC | 181 (10,781) | 1.34 (1.11, 1.63) | ≤5 cases (793) | - |
| Foremen: clay, glass and stone processing, and forming | 14 (316) | 1.36 (0.68, 2.70) | ≤5 cases (20) | - |
| Furnacemen/kilnmen: clay, glass and stone | 13 (516) | 1.01 (0.50, 2.07) | ≤5 cases (39) | - |
| Separating, grinding, crushing, mixing: clay, glass and stone | 20 (578) | 1.30 (0.73, 2.32) | ≤5 cases (27) | - |
| Forming: clay, glass and stone | 30 (1,874) | 1.89 (1.18, 3.02) | ≤5 cases (132) | - |
| LOEW: clay, glass and stone processing/forming | 93 (3,790) | 1.06 (0.81, 1.39) | 10 (412) | 1.36 (0.60, 3.08) |
| Clay, glass and stone processing, forming and related, NEC | 67 (2,492) | 1.27 (0.93, 1.74) | 6 (433) | 0.80 (0.28, 2.30) |
| Foremen: chemicals, petroleum, rubber, plastic and related materials processing | 18 (927) | 1.00 (0.55, 1.84) | ≤5 cases (207) | - |
| Mixing/blending, chemicals and related materials | 49 (2,608) | 0.89 (0.61, 1.28) | 6 (305) | 0.88 (0.31, 2.51) |
| Crushing/grinding, chemicals and related materials | 16 (705) | 1.08 (0.57, 2.05) | ≤5 cases (300) | - |
| Coating/calendering, chemicals and related materials | 8 (451) | 0.82 (0.33, 2.05) | ≤5 cases (241) | - |
| ITGS: chemicals, petroleum, rubber, plastic and related materials processing | 7 (243) | 1.17 (0.44, 3.09) | 9 (249) | 1.83 (0.78, 4.32) |
| LOEW: chemicals, petroleum, rubber, plastic and related materials processing | 57 (5,519) | 1.05 (0.75, 1.48) | 30 (2,538) | 1.41 (0.88, 2.25) |
| Chemicals, petroleum, rubber, plastic and related materials processing, NEC | 207 (19,001) | 1.00 (0.84, 1.20) | 163 (10,032) | 1.39 (1.13, 1.70) |
| Foremen: food, beverage and related processing | 25 (1,270) | 1.01 (0.60, 1.68) | 7 (532) | 1.33 (0.50, 3.53) |
| Flour/grain milling | 13 (692) | 0.82 (0.40, 1.67) | ≤5 cases (35) | - |
| Baking, confectionery making and related | 89 (6,131) | 0.87 (0.66, 1.15) | 54 (4,994) | 0.84 (0.59, 1.19) |
| Slaughtering/meat cutting, canning, curing/packing | 199 (11,286) | 0.91 (0.76, 1.09) | 40 (2,672) | 1.01 (0.67, 1.53) |
| Fish canning, curing/packing | 39 (1,122) | 1.68 (1.11, 2.54) | 15 (955) | 0.77 (0.39, 1.49) |
| Fruit/vegetable canning, preserving/packing | 7 (285) | 1.13 (0.43, 3.00) | 6 (189) | 1.43 (0.50, 4.10) |
| Milk processing | 15 (729) | 0.98 (0.51, 1.91) | ≤5 cases (129) | - |
| ITGS: food, beverage and related processing | ≤5 cases (675) | - | 12 (809) | 1.28 (0.61, 2.69) |
| Beverage processing | 30 (1,649) | 0.82 (0.51, 1.32) | 7 (375) | 0.96 (0.36, 2.55) |
| LOEW: food, beverage and related processing | 282 (19,528) | 1.05 (0.90, 1.23) | 150 (12,655) | 1.06 (0.86, 1.31) |
| Food, beverage and related processing, NEC | 73 (6,482) | 0.97 (0.72, 1.31) | 39 (3,224) | 1.14 (0.76, 1.73) |
| Sawmill sawyers and related | 20 (1,588) | 1.33 (0.75, 2.37) | ≤5 cases (114) | - |
| LOEW: wood processing, except pulp/papermaking | 59 (3,052) | 1.09 (0.78, 1.53) | 8 (328) | 1.30 (0.52, 3.24) |
| Wood processing, except pulp/papermaking, NEC | 14 (1,066) | 1.34 (0.67, 2.67) | ≤5 cases (156) | - |
| Foremen: pulp/papermaking and related | 10 (330) | 1.75 (0.78, 3.96) | 0 (13) | - |
| Cellulose pulp preparing | 7 (434) | 1.13 (0.43, 2.99) | 0 (48) | - |
| Papermaking/finishing | 19 (1,502) | 0.86 (0.48, 1.56) | 8 (428) | 1.46 (0.59, 3.62) |
| LOEW: pulp/papermaking | 28 (1,435) | 0.87 (0.53, 1.42) | ≤5 cases (144) | - |
| Pulp/papermaking and related, NEC | 31 (1354) | 0.97 (0.61, 1.54) | ≤5 cases (175) | - |
| Textile spinning/twisting | 6 (184) | 1.34 (0.47, 3.82) | 11 (334) | 1.54 (0.71, 3.35) |
| Textile winding/reeling | ≤5 cases (158) | - | 7 (271) | 1.23 (0.47, 3.26) |
| Textile weaving | ≤5 cases (835) | - | 8 (726) | 0.98 (0.39, 2.43) |
| Knitting | 11 (440) | 1.12 (0.52, 2.45) | 6 (633) | 0.45 (0.16, 1.30) |
| ITGS: textile processing | 6 (219) | 1.91 (0.67, 5.48) | 8 (361) | 1.57 (0.63, 3.90) |
| LOEW: textile processing | 26 (1,951) | 1.19 (0.72, 1.97) | 16 (1,367) | 1.19 (0.63, 2.27) |
| Textile processing, NEC | 30 (1,308) | 1.40 (0.88, 2.24) | 19 (724) | 1.51 (0.84, 2.73) |
| Tobacco processing | ≤5 cases (250) | - | 6 (183) | 1.44 (0.50, 4.11) |
| Hide/pelt processing | 10 (266) | 1.46 (0.65, 3.30) | ≤5 cases (197) | - |
| LOEW: other processing | 37 (6,556) | 1.60 (1.05, 2.44) | 7 (1,286) | 1.29 (0.49, 3.42) |
| Foremen: metal machining | 32 (1,254) | 1.20 (0.76, 1.89) | ≤5 cases (88) | - |
| Tool/die making | 164 (9,800) | 1.00 (0.82, 1.23) | 9 (357) | 1.89 (0.80, 4.47) |
| Machinist/machine tool setting-up | 431 (21,526) | 1.02 (0.90, 1.16) | 24 (1,210) | 1.55 (0.92, 2.63) |
| Machine tool operating | 162 (8,282) | 1.31 (1.07, 1.61) | 6 (839) | 0.70 (0.24, 2.00) |
| ITGS: metal machining | 8 (149) | 1.74 (0.70, 4.32) | 0 (48) | - |
| Metal machining, NEC | 13 (354) | 1.71 (0.84, 3.50) | ≤5 cases (47) | - |
| Foremen: metal shaping/forming, except machining | 58 (1,858) | 1.31 (0.94, 1.84) | ≤5 cases (98) | - |
| Forging | 55 (2,318) | 1.54 (1.09, 2.18) | 8 (211) | 3.06 (1.23, 7.61) |
| Sheet metal workers | 280 (11,951) | 1.05 (0.90, 1.23) | 30 (1,062) | 1.27 (0.79, 2.03) |
| Metalworking-machine operators, NEC | 953 (50,125) | 1.13 (1.04, 1.23) | 233 (11,965) | 1.33 (1.12, 1.57) |
| Welding/flame cutting | 873 (45,021) | 1.07 (0.98, 1.17) | 31 (2,089) | 1.28 (0.81, 2.04) |
| ITGS: metal shaping/forming, except machining | 11 (212) | 1.61 (0.74, 3.51) | ≤5 cases (58) | - |
| Boilermakers, platers and structural metal workers | 96 (4,139) | 1.86 (1.43, 2.42) | ≤5 cases (293) | - |
| Metal shaping and forming, except machining, NEC | 100 (11,078) | 1.83 (1.41, 2.37) | 15 (1,630) | 1.85 (0.95, 3.59) |
| Wood sawing and related, except sawmill | 35 (1,708) | 1.00 (0.65, 1.54) | ≤5 cases (167) | - |
| Planing, turning, shaping and related wood machining | 52 (5,199) | 0.93 (0.65, 1.32) | 9 (842) | 1.01 (0.43, 2.39) |
| Cutting/shaping: clay, glass and stone | 14 (591) | 1.11 (0.56, 2.21) | 0 (43) | - |
| Clay, glass and stone and related materials machining, NEC | 15 (751) | 0.78 (0.40, 1.51) | ≤5 cases (49) | - |
| Engravers, etchers and related | 8 (845) | 1.50 (0.60, 3.72) | ≤5 cases (150) | - |
| Filing, grinding, buffing, cleaning and polishing, NEC | 231 (8,176) | 1.20 (1.01, 1.42) | 15 (793) | 1.02 (0.53, 1.99) |
| Patternmakers/mouldmakers, NEC | 17 (1,346) | 1.06 (0.57, 1.97) | 6 (191) | 4.16 (1.45, 11.9) |
| ITGS: machining, NEC | 7 (569) | 2.21 (0.83, 5.85) | ≤5 cases (168) | - |
| Foremen: F/A, metal products, NEC | 53 (2,596) | 1.06 (0.74, 1.51) | ≤5 cases (290) | - |
| Engine and related equipment F/A, NEC | 11 (744) | 2.02 (0.93, 4.39) | ≤5 cases (81) | - |
| Motor vehicle F/A, NEC | 745 (41,686) | 1.11 (1.01, 1.23) | 172 (11,790) | 1.73 (1.42, 2.11) |
| Aircraft F/A, NEC | 94 (3,249) | 1.15 (0.88, 1.51) | 7 (407) | 0.95 (0.36, 2.52) |
| Industrial, farm, construction and other mechanized equipment and machinery F/A, NEC | 77 (5,641) | 1.11 (0.83, 1.49) | 14 (1,123) | 1.86 (0.93, 3.70) |
| Business/commercial machines F/A, NEC | 0 (41) | - | 6 (118) | 1.69 (0.59, 4.83) |
| ITGS: F/A metal products, NEC | 106 (2,849) | 1.28 (1.00, 1.65) | 17 (554) | 1.51 (0.81, 2.82) |
| LOEW: F/A metal products, NEC | 105 (4,387) | 1.08 (0.84, 1.38) | 14 (656) | 1.16 (0.58, 2.30) |
| Other F/A, metal products, NEC | 290 (11,980) | 1.16 (0.99, 1.35) | 132 (5,758) | 1.17 (0.94, 1.47) |
| Foremen: FAIR, electrical, electronic and related equipment | 25 (1,650) | 1.20 (0.72, 2.01) | 8 (261) | 1.93 (0.78, 4.79) |
| Electrical equipment F/A | 190 (9,020) | 1.17 (0.97, 1.41) | 150 (5,873) | 1.43 (1.16, 1.77) |
| Electrical and related equipment installing and repairing, NEC | 87 (7,597) | 0.97 (0.73, 1.27) | ≤5 cases (342) | - |
| Electronic equipment F/A | 20 (1,205) | 0.79 (0.44, 1.40) | 64 (2,748) | 1.06 (0.77, 1.46) |
| Electronic and related equipment installing and repairing, NEC | 22 (4,219) | 1.01 (0.58, 1.74) | 27 (1,944) | 2.65 (1.61, 4.36) |
| ITGS: FAIR, electrical, electronic and related equipment | 15 (387) | 1.31 (0.67, 2.54) | 9 (407) | 0.86 (0.37, 2.04) |
| Radio/television service repairmen | 16 (589) | 0.94 (0.49, 1.79) | ≤5 cases (44) | - |
| LOEW: FAIR, electrical, electronic and related equipment | 35 (1,139) | 1.45 (0.94, 2.24) | 17 (699) | 1.07 (0.57, 2.01) |
| FAIR: electrical, electronic and related equipment, NEC | 33 (1,414) | 0.85 (0.54, 1.33) | 19 (660) | 1.18 (0.66, 2.14) |
| Foremen: FA, wood products | 15 (517) | 1.07 (0.55, 2.09) | 0 (32) | - |
| Cabinet and wood furniture makers | 91 (8,708) | 0.69 (0.53, 0.91) | 15 (1,056) | 1.23 (0.63, 2.39) |
| LOEW: FA, wood products | 83 (6,046) | 0.70 (0.53, 0.93) | 13 (859) | 0.77 (0.38, 1.57) |
| FA, wood products, NEC | 94 (7,782) | 0.81 (0.62, 1.05) | 18 (1,125) | 1.08 (0.59, 1.98) |
| Foremen: FA, textile, fur and leather products | 10 (245) | 1.50 (0.66, 3.39) | ≤5 cases (278) | - |
| Patternmaking, marking and cutting: textile, fur/leather products | 23 (1525) | 0.82 (0.48, 1.40) | 14 (1,178) | 0.64 (0.32, 1.28) |
| Shoemaking/repairing | ≤5 cases (381) | - | 8 (539) | 0.70 (0.28, 1.74) |
| Upholsterers | 35 (2,462) | 0.70 (0.45, 1.08) | ≤5 cases (528) | - |
| Sewing machine operators, textile and similar materials | 33 (1,885) | 0.96 (0.61, 1.50) | 177 (11,996) | 0.71 (0.59, 0.87) |
| ITGS: FA, textile, fur and leather products | ≤5 cases (94) | - | 10 (433) | 1.13 (0.50, 2.55) |
| LOEW: FA, textile, fur and leather products | 14 (923) | 0.66 (0.33, 1.32) | 22 (1,256) | 0.70 (0.41, 1.22) |
| FA: textile, fur and leather products, NEC | 30 (1,488) | 0.92 (0.57, 1.47) | 39 (2,438) | 0.76 (0.50, 1.15) |
| Foremen: FA, rubber, plastic and related products | 25 (1,150) | 1.40 (0.83, 2.34) | ≤5 cases (218) | - |
| Bonding and cementing, rubber, plastic and related products | 61 (3,317) | 1.03 (0.74, 1.44) | 14 (634) | 1.20 (0.60, 2.39) |
| Moulding, rubber, plastic and related products | 13 (885) | 0.79 (0.39, 1.62) | 6 (411) | 0.85 (0.30, 2.43) |
| ITGS: FA, rubber, plastic and related products | 6 (260) | 1.17 (0.41, 3.34) | ≤5 cases (149) | - |
| LOEW: FA, rubber, plastic and related products | 43 (2,931) | 0.71 (0.48, 1.06) | 24 (1,217) | 1.04 (0.62, 1.76) |
| FA: rubber, plastic and related products, NEC | 50 (3,136) | 0.88 (0.61, 1.26) | 36 (1,702) | 1.14 (0.74, 1.76) |
| Foremen: mechanics/repairmen, except electrical | 47 (1,337) | 1.14 (0.78, 1.66) | 0 (58) | - |
| Motor vehicle mechanics/repairmen | 935 (58,348) | 1.02 (0.93, 1.11) | 11 (995) | 1.40 (0.64, 3.04) |
| Aircraft mechanics/repairmen | 40 (3,100) | 0.87 (0.58, 1.31) | 0 (93) | - |
| Rail transport equipment mechanics/repairmen | 26 (1,365) | 0.90 (0.54, 1.48) | ≤5 cases (27) | - |
| Industrial, farm and construction machinery mechanics/repairmen | 844 (37,584) | 1.25 (1.15, 1.37) | 9 (669) | 1.40 (0.60, 3.32) |
| Business/commercial machine mechanics/repairmen | 7 (746) | 0.49 (0.18, 1.29) | ≤5 cases (55) | - |
| Precision instrument mechanics/repairmen | 7 (452) | 1.41 (0.53, 3.74) | ≤5 cases (23) | - |
| Mechanics/repairmen, except electrical, NEC | 523 (17,853) | 1.02 (0.91, 1.14) | 12 (439) | 1.57 (0.75, 3.30) |
| Foremen: product FA, NEC | 14 (982) | 1.14 (0.57, 2.28) | ≤5 cases (220) | - |
| Marine craft FA | 18 (690) | 1.09 (0.59, 2.00) | 0 (28) | - |
| Paper product F/A | 100 (5,217) | 1.15 (0.89, 1.49) | 29 (1,623) | 1.04 (0.65, 1.68) |
| Painting/decorating, except construction | 193 (10,194) | 1.17 (0.97, 1.41) | 28 (1,272) | 2.19 (1.34, 3.56) |
| ITGS: product FA, NEC | 6 (93) | 2.42 (0.85, 6.92) | 6 (157) | 1.67 (0.59, 4.79) |
| LOEW: product FA, NEC | 46 (2,122) | 1.14 (0.78, 1.67) | 12 (584) | 1.00 (0.48, 2.11) |
| Other product FA, NEC | 143 (16,143) | 1.34 (1.08, 1.66) | 103 (8,020) | 1.64 (1.27, 2.12) |
| Foremen: excavating/grading/paving | 53 (1,709) | 1.70 (1.19, 2.42) | 0 (40) | - |
| Excavating, grading and related | 180 (7,918) | 1.72 (1.42, 2.09) | ≤5 cases (206) | - |
| Paving, surfacing and related | 16 (432) | 1.33 (0.70, 2.53) | ≤5 cases (6) | - |
| Railway sectionmen/trackmen | 47 (2,081) | 1.28 (0.88, 1.86) | ≤5 cases (50) | - |
| LOEW: excavating/grading/paving | 116 (3,013) | 1.50 (1.18, 1.91) | ≤5 cases (76) | - |
| Excavating/grading/paving, NEC | 152 (3,812) | 1.44 (1.17, 1.78) | ≤5 cases (73) | - |
| Foremen: electrical power, lighting and wire communications equipment erecting, installing and repairing | 26 (1,514) | 1.15 (0.70, 1.91) | 0 (55) | - |
| Electrical power linemen and related | 51 (3,327) | 0.72 (0.50, 1.03) | ≤5 cases (88) | - |
| Construction electricians and repairmen | 369 (20,611) | 0.93 (0.81, 1.07) | ≤5 cases (273) | - |
| Wire communications and related equipment installing/repairing | 57 (7,159) | 0.78 (0.56, 1.10) | 6 (526) | 1.12 (0.39, 3.22) |
| LOEW: electrical power, lighting and wire communications equipment erecting, installing and repairing | 42 (1,388) | 1.41 (0.95, 2.10) | ≤5 cases (71) | - |
| Electrical power, lighting and wire communications equipment erecting, installing and repairing, NEC | 25 (2,845) | 0.87 (0.52, 1.45) | ≤5 cases (123) | - |
| Foremen: other construction trades | 165 (6,519) | 1.25 (1.02, 1.53) | ≤5 cases (121) | - |
| Carpenters and related | 607 (29,856) | 0.99 (0.89, 1.10) | 6 (250) | 2.82 (0.99, 8.03) |
| Brick/stone masons and tile setters | 217 (8,405) | 1.05 (0.88, 1.26) | ≤5 cases (51) | - |
| Concrete finishing and related | 48 (2,389) | 1.00 (0.69, 1.45) | 0 (23) | - |
| Plasterers and related | 118 (5,602) | 1.30 (1.03, 1.65) | ≤5 cases (84) | - |
| Painters, paperhangers and related | 209 (7,062) | 1.41 (1.18, 1.69) | ≤5 cases (458) | - |
| Insulating, construction | 44 (1,303) | 2.52 (1.71, 3.71) | ≤5 cases (45) |  |
| Roofing, waterproofing and related | 79 (6,137) | 1.05 (0.79, 1.41) | ≤5 cases (37) |  |
| Pipefitting, plumbing and related | 367 (16,779) | 1.13 (0.99, 1.29) | ≤5 cases (213) | - |
| Structural metal erectors | 92 (3,287) | 1.37 (1.05, 1.79) | ≤5 cases (44) | - |
| Glaziers | 46 (2,766) | 1.27 (0.87, 1.85) | ≤5 cases (81) | - |
| ITGS: construction, except electrical | 11 (774) | 1.09 (0.50, 2.37) | 0 (72) | - |
| LOEW: other construction trades | 766 (36,883) | 0.90 (0.82, 0.99) | 10 (437) | 1.33 (0.59, 3.01) |
| Other construction trades, NEC | 470 (47,327) | 1.28 (1.13, 1.44) | 6 (968) | 1.36 (0.48, 3.91) |
| Air transport operating support | 32 (2,708) | 0.25 (0.16, 0.40) | ≤5 cases (462) | - |
| Air transport operating, NEC | 19 (5,008) | 1.13 (0.63, 2.05) | ≤5 cases (812) | - |
| Foremen: railway transport operating | 10 (396) | 1.52 (0.67, 3.43) | 0 (26) | - |
| Locomotive engineers/firemen | 24 (879) | 1.21 (0.72, 2.05) | 0 (18) | - |
| Conductors/brakemen, railway | 49 (1,901) | 1.24 (0.86, 1.79) | ≤5 cases (101) | - |
| Railway transport operating support | 21 (1,002) | 1.50 (0.85, 2.63) | 0 (71) | - |
| Deck officers | 6 (293) | 1.07 (0.37, 3.06) | 0 (22) | - |
| Engineering officers, ship | 7 (320) | 1.00 (0.38, 2.64) | 0 (14) | - |
| Deck crew, ship | 19 (1,397) | 0.88 (0.49, 1.60) | 0 (63) | - |
| Water transport operating, NEC | 8 (457) | 0.84 (0.34, 2.08) | 0 (41) | - |
| Foremen: motor transport operating | 49 (1,753) | 1.35 (0.94, 1.96) | ≤5 cases (116) | - |
| Bus drivers | 177 (5,345) | 1.19 (0.98, 1.44) | 62 (2,388) | 1.36 (0.98, 1.89) |
| Taxi drivers/chauffeurs | 62 (2,817) | 1.02 (0.73, 1.41) | 20 (610) | 2.33 (1.31, 4.15) |
| Motor transport operating, NEC | 96 (11,255) | 2.15 (1.65, 2.79) | 11 (1,090) | 2.42 (1.11, 5.27) |
| Subway/street railway operating | 8 (343) | 1.07 (0.43, 2.66) | ≤5 cases (48) | - |
| Motormen/dinkeymen, except rail transport | 7 (191) | 1.07 (0.40, 2.83) | 0 (3) | - |
| Other transport and related equipment operating, NEC | 124 (11,726) | 1.94 (1.54, 2.45) | 39 (4,457) | 2.32 (1.53, 3.50) |
| Foremen: materials handling and related, NEC | 66 (2,170) | 1.17 (0.85, 1.61) | 8 (343) | 1.28 (0.52, 3.19) |
| Hoisting, NEC | 170 (5,049) | 1.48 (1.21, 1.80) | ≤5 cases (104) | - |
| Longshoremen, stevedores and freight handlers | 529 (32,219) | 0.92 (0.82, 1.03) | 57 (2,884) | 1.10 (0.78, 1.55) |
| Materials handling equipment operators, NEC | 433 (13,623) | 1.35 (1.19, 1.53) | 16 (576) | 1.64 (0.86, 3.13) |
| Packaging, NEC | 185 (11,397) | 0.86 (0.71, 1.04) | 320 (15,188) | 0.96 (0.83, 1.11) |
| LOEW: materials handling | 562 (57,377) | 1.32 (1.18, 1.47) | 121 (11,569) | 1.89 (1.49, 2.39) |
| Materials handling and related, NEC | 209 (11,180) | 0.96 (0.80, 1.15) | 47 (1,645) | 1.52 (1.04, 2.22) |
| Foremen: printing and related | 11 (437) | 1.30 (0.60, 2.82) | ≤5 cases (159) | - |
| Typesetters and compositors | 7 (540) | 0.59 (0.22, 1.56) | ≤5 cases (281) | - |
| Printing press | 111 (6,721) | 1.01 (0.79, 1.29) | 29 (1,132) | 1.60 (0.99, 2.58) |
| Bookbinders and related | 18 (1,793) | 0.72 (0.39, 1.33) | 50 (1,833) | 1.70 (1.18, 2.45) |
| LOEW: printing and related, NEC | 27 (1,386) | 1.26 (0.77, 2.07) | 20 (633) | 1.44 (0.81, 2.55) |
| Printing and related, NEC | 47 (3,422) | 0.81 (0.55, 1.17) | 44 (2,028) | 1.24 (0.84, 1.84) |
| Foremen: stationary engine and utilities equipment operating and related | 9 (257) | 0.95 (0.40, 2.24) | 0 (8) | - |
| Power station operators | 13 (626) | 1.41 (0.69, 2.89) | ≤5 cases (76) | - |
| Stationary engine and utilities equipment operating and related, NEC | 188 (6,417) | 1.28 (1.06, 1.54) | ≤5 cases (300) | - |
| Photographic processing | ≤5 cases (362) | - | 7 (376) | 1.83 (0.69, 4.84) |
| Supervisors/foremen, NEC | 151 (3,645) | 1.28 (1.03, 1.57) | 9 (486) | 0.91 (0.38, 2.14) |
| ITGS: NEC | 61 (1,805) | 1.22 (0.87, 1.69) | 33 (831) | 1.73 (1.10, 2.71) |
| Labourers, NEC | 1,784 (136,636) | 1.05 (0.99, 1.12) | 427 (33,479) | 1.29 (1.13, 1.46) |
| Other occupations, NEC | 949 (37,931) | 1.11 (1.02, 1.21) | 136 (6,396) | 1.22 (0.98, 1.52) |

***Abbreviations:*** NEC = Not Elsewhere Classified

FA = Fabricating and assembling

FAIR: Fabricating, assembling, installing and repairing

LOEW = Labouring and other elemental work

ITGS = Inspecting, testing, grading and sampling
